# Supplementary material
Source: HighWire-hosted journal article supplement (https://gut.bmj.com/content/gutjnl-2021-326323)
Supplement: inline-supplementary-material-1 [file inline-supplementary-material-1.pdf]

## 1 SUPPLEMENTARY MATERIAL

### 2 Supplementary Materials and Methods

#### 3 Plasmids encoding cell culture infectious HCV recombinants

4 Original cell culture infectious genotype 1a strain TN (TNcc), genotype 2a strain J6 (J6cc) and  
5 genotype 3a strain DBN (DBN3acc) recombinants were developed previously.<sup>26–28</sup> High-yield HI-  
6 recombinants were engineered based on generated subclones harboring the desired mutations using  
7 In-Fusion technology. In brief, 50ng of gel purified PCR amplicons generated using the subclones  
8 with the sequences of interest as templates were incubated with 2µl of 5x In-Fusion HD enzyme  
9 (Takara Bio) and H<sub>2</sub>O added to a total volume of 10µl. The reaction was incubated for 15min at 50°C  
10 and 4µl of the mix was transformed in 50µl Stellar Competent Cells (Takara) according to the  
11 manufacturers' protocol.

12 Previously developed cell culture infectious HCV recombinants with genotype(isolate) 1a(TN),  
13 1b(J4), 2a(J6), 2b(J8), 3a(S52), 3a(DBN), 4a(ED43), 5a(SA13), 6a(HK6a)<sup>24,25,30</sup> specific core-NS2  
14 and remaining sequences of genotype 2a isolate JFH1 were used in *in vitro* neutralization assays.  
15 Except for 6a(HK6a) containing two vital cell culture adaptive substitutions in the envelope proteins,  
16 these viruses reflected the consensus envelope protein sequences determined *in vivo*.  
17 For all plasmid preparations used in experiments the complete HCV sequence was verified by Sanger  
18 sequencing (Macrogen).

19

#### 20 Maintenance of Huh7.5 and HEK283 cells

21 The human hepatoma cell line Huh7.5<sup>25</sup> and the human embryonic kidney cell line HEK293 were  
22 cultured with Dulbecco's modified Eagle medium (DMEM) (Invitrogen) containing 10% fetal bovine  
23 serum (Sigma), penicillin 100U/ml and streptomycin 100µg/ml (P/S) (Gibco/Invitrogen) at 37°C and  
24 5% CO<sub>2</sub>; cultures were split every 2–3 days using trypsin (ThermoFisher Scientific) as described.<sup>25</sup>

25

#### 26 Transfection of HCV *in vitro* RNA transcripts in Huh7.5 cells

27 *In vitro* HCV RNA transcripts were generated and transfections were carried out as previously  
28 described.<sup>25</sup> Briefly, plasmids were linearized with XbaI (New England Biolabs) following the  
29 sequence encoding the 3' end of the HCV genome, and RNA *in vitro* transcription reactions were  
30 carried out using T7 RNA polymerase (Promega). RNA concentrations were measured using the  
31 Qubit RNA BR Assay Kit (Thermo Fisher Scientific); for recombinants directly compared in the  
32 same graph, equal amounts of RNA transcripts were used. Prior to the day of transfection, 400,000

33 cells were seeded per well of a 6 well plate (Nunc); 7.6µg of TNcc or TNcc-HI, 7.5µg of J6cc or  
34 J6cc-HI, and 5µg of DBN3acc or DBNcc-HI RNA transcripts were combined with 5µl  
35 Lipofectamine2000 (Invitrogen) in a total of 500µl Opti-MEM (Gibco/Invitrogen) and cells were  
36 incubated with the resulting transfection complexes in a total of 2ml Opti-MEM for 4-6h prior to  
37 washing with PBS and addition of serum containing medium (DMEM+10%FBS+P/S). Transfected  
38 cultures were split every 2-3 days. When cells were split replicate cell cultures were plated in chamber  
39 slides for immunostaining to monitor the % of infected cells. In addition, supernatant was collected  
40 and stored at -80°C for determination of HCV infectivity titers.

41

#### 42 Infection of Huh7.5 cells with HCV

43 400,000cells/well in 6 well plates plated the previous day, were inoculated at the specified  
44 multiplicity of infection (MOI) using supernatants derived from the transfection experiment at the  
45 peak of infection, as determined by immunostaining and infectivity titration. Infected cultures were  
46 split every 2-3 days. When cells were split, replicate cell cultures were plated in chamber slides for  
47 immunostaining to monitor the % of infected cells. In addition, supernatant was collected and stored  
48 at -80°C for determination of HCV infectivity titers.

49

#### 50 Serial passage of HCV in Huh7.5 cells

51 For serial passage of cell culture infectious HCV recombinants, 10<sup>6</sup> cells were seeded into T25 flasks  
52 (ThermoFisher Scientific) and the following day inoculated with up to 1ml cell culture supernatant  
53 derived from the previous passage at the peak of infection as determined by immunostaining. The  
54 first passage culture was inoculated with up to 1ml of supernatant derived from a prior transfection  
55 culture at the peak of infection. When cells were split, replicate cell cultures were plated in chamber  
56 slides for immunostaining of HCV antigen to monitor the % of infected cells and supernatant was  
57 collected and stored at -80°C for determination of HCV infectivity titers.

58

#### 59 Generation of virus stocks

60 For generation of HCV stocks for neutralization assays and of seed stocks for vaccine virus  
61 production, 6x10<sup>6</sup> cells were plated in T175 flasks and the next day inoculated with cell culture  
62 supernatant derived from the peak of infection. When cells were split, replicate cell cultures were  
63 plated in chamber slides for immunostaining to monitor the % of infected cells. In addition,  
64 supernatant was collected and stored at -80°C for determination of HCV infectivity titers.

65 Supernatants derived on days where a high % of HCV infected cells was recorded by immunostaining,  
66 and/or a high infectivity titer was recorded, were pooled and used as virus stocks. For virus stocks  
67 used in neutralization assays, the envelope protein sequence was confirmed by Sanger sequencing.  
68 For virus seed stocks for vaccine virus production, the complete HCV open reading frame (ORF) was  
69 analyzed by next generation sequencing (NGS).

70

#### 71 Immunostaining of HCV antigens in cell culture

72 Immunostaining of HCV antigens was done on replicate cultures derived when HCV infected cells  
73 were split using primary monoclonal anti-HCV core antibody C7-50 ((EnzoLifeSciences diluted  
74 1:5000 in BSK (PBS supplemented with 0.2% skim milk (Easis) and 1% Bovine Serum Albumin,  
75 (Sigma)) and monoclonal anti-HCV NS5A antibody 9E10<sup>24</sup> diluted 1:5000 in BSK.<sup>25</sup> After at least  
76 1h of incubation and subsequent washing, secondary antibody Alexa Flour 488 goat anti mouse IgG  
77 (H+L) (Invitrogen) diluted 1:500 in BSK was added and cell nuclei were counterstained with Hoechst  
78 reagent (Invitrogen).<sup>25,34</sup> The % of infected cells was scored from 0% to 100%, using intervals of  
79 10%, by fluorescence microscopy with a Zeiss Axio Vert.A1 microscope.

80

#### 81 Determination of HCV infectivity titers

82 HCV infectivity titers were determined in cell culture supernatant as focus-forming units (FFU)/ml  
83 as previously described.<sup>25</sup> In brief, 6000 cells were seeded per well of 96 well plates (Nunc) and  
84 infected the following day with serially diluted cell culture supernatants, testing each dilution in  
85 triplicate. After 48h of incubation, cells were fixed using methanol and stained for HCV antigens  
86 using primary anti-HCV core antibody C7-50 (EnzoLifeSciences) diluted 1:1000 in BSK and anti-  
87 HCV NS5A antibody 9E10 diluted 1:3000 in BSK, followed by secondary antibody ECL sheep anti-  
88 mouse IgG diluted 1:500 in BSK.<sup>34</sup> The HCV antigen positive cells were visualized and FFU were  
89 automatically counted using an Immunospot series 5 UV analyzer (CTL Europe GmbH) as  
90 described.<sup>25</sup>

91

#### 92 Sequence analysis of cell culture derived HCV

93 HCV RNA was extracted from cell culture supernatants using Trizol LS (Life technology) and the  
94 RNeasy MinElute kit (QIAGEN) as described.<sup>33</sup> RNA was eluted and used for reverse transcription  
95 with Maxima H Minus Reverse Transcriptase (ThermoScientific) and genotype specific reverse  
96 primers binding to the HCV 3'UTR variable region as described<sup>33,32</sup> (Supplementary Table 1).

97 Polymerase chain reaction (PCR)-based amplification of the complete open reading frame (ORF) was  
98 carried out using Q5 Hot start High-Fidelity DNA polymerase and genotype specific primers as  
99 described<sup>33,32</sup> (Supplementary Table 2). Alternatively, for virus stocks used for neutralization assays,  
100 a PCR amplicon spanning the envelope proteins was generated (Supplementary Table 2). The  
101 sequence of the resulting PCR amplicons was either determined by Sanger sequencing or by NGS.  
102 NGS was carried out as described.<sup>33</sup> In brief, PCR amplicons were loaded on a gel with SYBR safe  
103 DNA gel stain (Invitrogen), visualized with blue light and gel extracted with the Large Fragment  
104 DNA recovery kit (Zymo Research). Size selection was done with magnetic beads and adaptors with  
105 unique barcodes with the use of TruSeq Nano DNA library kit (Illumina). Finally, paired-end  
106 sequencing was performed on the Miseq platform. Viruses from serial passage experiments, first  
107 passage kinetic experiments and virus seed stocks used for vaccine production, were subjected to  
108 NGS of the complete ORF. Virus stocks for neutralization assays were subjected to Sanger  
109 sequencing of genome regions encoding E1 and E2.

110

#### 111 Subclonal analysis

112 For serially passaged viruses, PCR amplicons spanning the complete ORF were subcloned using the  
113 TOPO-XL Cloning kit (Invitrogen) following the manufacturers' instructions. The HCV sequence of  
114 the resulting plasmids was determined by Sanger sequencing. TNcc-PP-10, TNcc-PP-18, TNcc-PP-  
115 38.1, J6cc-PP-35 and DBNcc-PP-16 were analyzed like this. For TNcc-PP-10, TNcc-PP-18 and  
116 TNcc-PP-38.1, phylogenetic analysis was carried out using MAFFT for aligning sequences and  
117 subsequently PhyML for building the phylogeny visualized by FigTree v1.4.3.

118

#### 119 HCV production for vaccine generation

120 HCV production for immunization studies was done using previously developed protocols.<sup>35</sup> In brief,  
121  $1.8 \times 10^6$  cells were plated in T500 triple layer cell culture flasks (ThermoFisher Scientific). The next  
122 day, cells were infected at MOI 0.003 with genotype 1a, 2a and 3a seed stocks. On day 1 post  
123 infection, around  $1.8 \times 10^8$  cells were plated in 10-layer cell-factories (ThermoFisher Scientific). When  
124 80% of cells were estimated to be infected by monitoring of a replicate T25 cell culture, cells in the  
125 cell-factory were washed with pre-warmed PBS and DMEM was replaced by Adenovirus Expression  
126 Medium (AEM) supplemented with P/S.<sup>34</sup> From the 10-layer cell-factories, supernatant was  
127 harvested every 2–3 days. Each factory yielded 5 harvests of 800ml each. For each HCV recombinant,

128 4 cell-factories were done, collecting a total volume of ~16l of virus containing supernatant.  
129 Harvested supernatant was stored at -80°C until further processing.

130

131 Processing of HCV for vaccine generation

132 HCV was processed for vaccine development using previously established protocols.<sup>35</sup> In brief, initial  
133 clarification of ~16l virus containing supernatant harvested from cell-factories was carried out  
134 through a 5µm capsule filter, followed by a 0.65µm Sartopure® PP3 filter (Sartorius). Afterwards,  
135 two tangential flow filtration (TFF) steps were carried out using a fiber with a surface area (SA) of  
136 2600cm<sup>2</sup> and a molecular weight cut off (MWCO) of 500kDa and subsequently a fiber with a SA of  
137 790cm<sup>2</sup> and a MWCO of 500kDa (MINIKROS 65cm 500KD MPES, MINIKROS 20cm 500KD  
138 MPES, Repligen), concentrating ~16l to ~350ml and subsequently to ~35ml. For a subsequent 3-  
139 cushion ultracentrifugation (UC) step, 3 cushions containing 1ml of 60%, 28% and 10% Optiprep  
140 Density Gradient Medium (Sigma), respectively, were layered on top of each other in 6 UC tubes. To  
141 each tube, ~6ml of virus sample were added and the total volume was adjusted to 11ml with PBS.  
142 After centrifugation with a Beckman SW-41 rotor at 40,000 revolutions per minute (rpm) at 4°C for  
143 2h, fraction 1 (8ml), fraction 2 (1.2ml) and fraction 3 (2ml) were collected from the top of each tube.  
144 Fraction 2 was pooled from 6 tubes and adjusted to a total volume of 20ml with PBS prior to TFF  
145 with a fiber with a SA of 20cm<sup>2</sup> and a MWCO of 500kDa (MICROKROS 20CM 500K MPES  
146 0.5MM, Repligen) resulting in concentration to ~2ml. For a subsequent equilibrium density gradient  
147 UC step one day prior to the experiment a semi-continuous 40% to 10% iodixanol gradient was  
148 prepared by layering 2.5ml of 40%, 30%, 20% and 10% Optiprep Density Gradient Medium on top  
149 of each other followed by equilibration at 4°C. The ~2ml sample resulting from the previous step was  
150 added on top of the gradient and ultracentrifugated at 40,000rpm with a Beckman SW-41 rotor for 6h  
151 at 4°C. Eighteen fractions of ~ 550µl were collected from the bottom of the tube and each fraction  
152 was weighed for determination of buoyant density. The three fractions with a density closest to  
153 1.1g/ml were pooled, obtaining a final volume of ~1.5ml. For a subsequent size exclusion  
154 chromatography step 1.54g of Sephadex G-100 (Sigma Aldrich) was mixed with 35ml sterile water  
155 3 days prior to the experiment and added to a chromatography PD-10 column (PD-10 reservoirs, GE  
156 Healthcare Life Science). The ~1.5ml of sample resulting from the previous step were then added to  
157 the column, and 12 fractions of ~1ml were eluted with NaCl (9 mg/ml). Based on absorbance  
158 determined with a NanoDrop (Thermo Scientific) at an OD of 230nm, 5 fractions were pooled,  
159 obtaining a final volume of close to 5ml. Finally, the resulting preparation was subjected to UV-

160 irradiation with a UVG-54 Handheld UV lamp (240nm UV, 6 watt) (Analytik Jena) for 25min with  
161 frequent agitation using a 6 well plate with 1.25ml of sample per well. To confirm inactivation, cells  
162 seeded one day prior to the experiment were inoculated with 100µl of UV inactivated sample, and  
163 cell cultures were followed for 3 weeks by splitting and immunostaining every 2-3 days.

164

#### 165 Immunization of mice

166 To evaluate immunogenicity of the developed vaccine candidates, 6-8 week-old female BALB/c mice  
167 were acquired from Taconic Farms, Denmark, and were housed in certified animal facilities at the  
168 University of Copenhagen. Animals were resting for at least one week following arrival to the animal  
169 facility. Animals were subcutaneously immunized four times every 3 weeks with processed and  
170 inactivated HCV or as a control with 100µg EndoFit OVA (Invitrogen) formulated with adjuvant  
171 AddaVax 50%/50% (v/v). Genotype 1a, 2a and 3a HCV vaccines contained an equivalent of 6.8, 8.6,  
172 and 8.6 log<sub>10</sub> FFU, respectively, determined prior to inactivation. Each experimental group including  
173 the control group consisted of 3 animals. Thus, a total of 12 animals were used. Animals were  
174 randomly assigned to the different groups and treatments were administered in random order. The  
175 size of the groups was determined based on availability of vaccine antigen. Two weeks after the last  
176 immunization mice were sacrificed and serum was obtained. IgG was purified from serum of each  
177 animal and was evaluated in *in vitro* neutralization assays as the primary outcome measure; in  
178 addition, IgG pools derived from each group were evaluated in *in vitro* neutralization assays as the  
179 primary outcome measure and in HCV E1/E2 complex ELISA assays as a secondary outcome  
180 measure. No animals were excluded from the study. All data obtained from all animals were reported.  
181 During the experiments, persons handling animals and samples were blinded to the identity of the  
182 vaccine antigen. Experiments were conducted in accordance with national Danish guidelines  
183 regarding animal experiments (Amendment # 1306 of November 23, 2007), approved by the Danish  
184 Animal Experiments Inspectorate, Ministry of Justice, permission numbers 2015-15-0201-00623.

185

#### 186 Patient samples

187 Sera or plasma from patients with chronic hepatitis C (CHC) were collected between May 2011 and  
188 August 2021 in biobanks attached to the Danish Database for Hepatitis B and C and the HCV Tandem  
189 cohort at the Department of Infectious Diseases, Copenhagen University Hospital, Hvidovre. Patients  
190 were ≥18 years, had no previous history of treatment for CHC, no co-infection with human  
191 immunodeficiency virus or hepatitis B virus, and no recent intravenous drug use. The HCV Tandem

192 cohort was approved by the Regional Ethical Committee (H-21004361), and the Danish Data  
193 Protection Agency (2012-58-0004); written informed consent was provided by all patients.

194

195 Purification, concentration and quantification of IgG from mouse serum and patient serum or plasma  
196 IgG from individual mouse serum or individual patient serum / plasma samples was purified with the  
197 Amicon® Pro Affinity Concentration Kit Protein G with 50kDa Amicon® Ultra-0.5 Device (Merck  
198 Millipore), in accordance to the manufacturers' instructions. Briefly, for mouse samples 200µl and  
199 for patient samples 600µl of Protein G resin was added to the column, followed by a wash step. Next,  
200 serum or plasma was added and incubated for 1h at room temperature on a shaker; 300-500µl of  
201 mouse serum or 600µl of patient serum or plasma was processed. Following the second wash, elution  
202 and neutralization buffer were added to obtain IgG. Concentration of IgG was done with the Vivaspin  
203 500, 30,000 MWCO (GE Lifescience) kit according to the manufacturers' instructions. Briefly, IgG  
204 resulting from the previous step was diluted in PBS to a total volume of 500µl and centrifugated at  
205 14,000g until a volume of ~80µl was obtained. Concentration of the resulting mouse IgG preparations  
206 was determined with the IgG (TOTAL) mouse uncoated ELISA Kit (ThermoFisher) according to the  
207 manufacturers' instructions. Briefly, 96 well plates were coated with capture antibody and incubated  
208 overnight, followed by incubation with blocking buffer. After several washes, concentrated and  
209 serially diluted IgG was added in duplicates together with the provided standards. Then, the detection  
210 antibody was added and incubated for two hours on a shaker. Next, substrate was added followed by  
211 stop solution and absorbance at an optical density (OD) of 490nm was measured (FLUOstar  
212 OPTIMA, BMG Labtech). The generated standard curve was used to calculate the IgG concentration.  
213 Concentration of the resulting patient IgG preparations was determined with the Cedex Bio Analyzer  
214 (Roche) according to the manufacturers' instructions.

215

#### 216 *In vitro* neutralization assay

217 Neutralization with human derived monoclonal antibodies AR3A and AR4A,<sup>17,18</sup> and polyclonal IgG  
218 C211<sup>19</sup> was done as described in.<sup>25</sup> In brief, these antibodies were serially diluted in cell growth  
219 medium (DMEM+10%FBS+P/S), added to the virus and incubated in a total of 100µl for 1h at 37°C.  
220 Each antibody concentration was tested in triplicate. Virus only controls were prepared by mixing  
221 virus with cell growth medium. Virus-antibody mixes, virus-medium mixes or medium only were  
222 then added to Huh7.5 cells, which had been seeded at 6000cells/well in 96 well poly-D-Lysine coated  
223 plates (Nunc) the day prior to the experiment. Following 3.5h incubation, cells were washed with

224 PBS and 100µl cell growth medium was added per well. After 48h of incubation at 37°C, plates were  
225 fixed with methanol and stained for HCV core and NS5A antigen as described for infectivity  
226 titrations.

227 Neutralization with purified mouse serum IgG or patient serum / plasma IgG was done using  
228 previously established assays.<sup>37</sup> In brief, these IgG were serially diluted in cell growth medium in a  
229 total of 3µl and added to virus diluted in 7µl to a total of 10µl and incubated for 1.5h at 37°C. Each  
230 antibody concentration was tested in triplicate. Virus only controls were prepared by mixing virus  
231 with cell growth medium. Subsequently, 30µl of cell growth medium were added to virus-IgG or  
232 virus-medium mixes and the resulting samples were added to Huh7.5 cells, which had been seeded  
233 at 6000cells/well in 96 well poly-D-Lysine coated plates (Nunc) the day prior to the experiment.  
234 Following 4.5h incubation at 37°C, cells were washed with PBS and 100µl of cell growth medium  
235 were added per well. As a positive neutralization control, C211 antibody and a well-defined genotype  
236 5a virus<sup>31</sup> were mixed and added to each 96-well plate. After 48h of incubation at 37°C, plates were  
237 fixed with methanol and BSK was added at 300µl/well. Following 1h incubation, BSK was removed  
238 and 100µg/ml Fab Fragment Goat anti-mouse IgG (Jackson ImmunoResearch) diluted in PBS was  
239 added and incubated for 1h at room temperature. Next, plates were washed and 50µl of monoclonal  
240 primary antibody 9E10 diluted 1:5000 in BSK was added per well. The remaining staining steps were  
241 done as described above for infectivity titrations.

242 For all neutralization assays, the percentage of neutralization was calculated relating the number of  
243 FFU in experimental wells to the mean number of FFU in virus only wells. For all neutralization  
244 assays, half maximal effective concentration (EC50) was calculated based on concentration-response  
245 curves, using top and bottom constrains of 0 and 100% and the formula  
246  $y=100/(1+10^{(\log_{10}EC50-X)\times\text{hillslope}})$  using GraphPad Prism, as described.<sup>34</sup> Fold-changes in neutralization  
247 sensitivity given in Figure 4 were calculated as [(EC50 of original virus)/(EC50 of virus with  
248 envelope substitutions)]; these calculated values are not meant to reflect data accuracy.

249

#### 250 HCV E1/E2 complex ELISA

251 Expression plasmids harboring E1 and E2 envelope protein sequences of TNcc-HI, J6cc-HI and  
252 DBNcc-HI were constructed using the In-Fusion HD cloning kit (Takara Bio) and 50ng of PCR  
253 amplicons harboring E1 and E2 sequences of the TNcc-HI, J6cc-HI or DBNcc-HI plasmid and an  
254 HCV pseudo-particle expression plasmid. The E1 and E2 sequence in the resulting plasmids was  
255 sequence confirmed (Macrogen). Plasmids were transfected in HEK293 cells, plated at



256  $8 \times 10^5$  cells/well in 6-well plates 1 day prior to the experiment, using 5  $\mu$ l Lipofectamine2000  
257 (Invitrogen) and 5  $\mu$ g plasmid in a total volume of 2ml of Opti-MEM (Invitrogen). Following 6h of  
258 incubation, Opti-MEM was replaced with DMEM+10%FBS+P/S. In a replicate culture, after 48h of  
259 incubation at 37°C, transfection efficiency was determined by immunostaining for E1/E2 protein  
260 using the monoclonal antibody AR4A<sup>17</sup> diluted 1:5000 in BSK for 1h at room temperature, followed  
261 by application of the anti-human Alexa Fluor 488 coupled secondary antibody, as described above.  
262 Following confirmation of expression, cell growth medium was discarded, and total protein was  
263 collected in lysate buffer (1% Triton X-100, 50nM Tris-HCl, 150nM NaCl, pH8.0). Next, the cell  
264 lysate was treated with Benzonase endonuclease (Sigma) and 2nM of MgCl<sub>2</sub> and finally, the  
265 generated protein was measured with BCA protein assay kit (Pierce<sup>TM</sup>) according to the  
266 manufacturers' instructions.

267 For ELISA assays, 96-well plates (Nunc) were coated with *Galanthus nivalis* lectin (Medicago) and  
268 the next day the plate was washed with PBS and blocked with 200  $\mu$ l of PBS-5% non-fat milk (Easis).  
269 The next day, the plates were washed with PBS containing 0.1% Tween (PBST) and 50  $\mu$ l of E1/E2  
270 complexes (200  $\mu$ g/ml) were added to the plates and incubated at 4°C overnight. After several washes  
271 with PBST, purified mouse serum IgG or immune-sera were serially diluted in PBST-1% non-fat  
272 milk, dilutions were added to plates in duplicates, and plates were incubated for 2h at room  
273 temperature, followed by a washing step with PBST. Binding of antibodies to E1/E2 complexes was  
274 detected by secondary antibody ECL sheep anti-mouse IgG horseradish-peroxidase linked whole  
275 antibody (GE Healthcare) diluted 1:1000 in PBST-1% non-fat milk and incubated for 1h at room  
276 temperature, followed by a washing step with PBST. TMB substrate (3,3', 5,5'-tetramethylbenzidine,  
277 Thermo Scientific) was then added for 10min followed by ELISA Stop Solution (Invitrogen).  
278 Absorbance was determined at 450nm with the use of an ELISA plate reader (BIO-TEK Instruments,  
279 Inc.). As positive controls, mouse anti-E2 antibody AP33<sup>39</sup> was used to bind TNcc-HI E1/E2 and  
280 DBNcc-HI E1/E2 complexes and H77.39<sup>40</sup> was used to bind J6cc-HI E1/E2 complexes. As negative  
281 control, only secondary antibody, ECL sheep anti-mouse IgG horseradish-peroxidase linked whole  
282 antibody (GE Healthcare) was added to the E1/E2 complexes omitting prior addition of mouse serum  
283 IgG, immune-sera or control antibodies.

## 284 **Supplementary Results**

285 Phylogenetic analysis of subclones of polyclonal passaged genotype 1a HCV from an initial passage  
286 line

287 For the original TNcc, TNcc-PP-10, TNcc-PP-18 and TNcc-PP-38.1, generated subclones were  
288 subjected to phylogenetic analysis using PhyML; subclones for the original TNcc were generated and  
289 reported previously.<sup>33</sup> Results of this analysis are shown in Supplementary Figure 1. In comparison  
290 to the TNcc plasmid sequence, in passage 10 and 18 viruses, this analysis revealed two main  
291 quasispecies populations, designated A and B. The A population was mainly characterized by  
292 signature substitutions N2651H and H2986R. The B population was mainly characterized by  
293 signature substitutions T2357A, S2375G, M2834L and H2986R. In the passage 10 subclones, the A  
294 and B population had similar frequency, with 8/18 subclones belonging to A and 7/18 subclones to  
295 B, respectively. In the passage 18 subclones, the A population appeared to prevail over the B  
296 population with 15/21 and 3/21 subclones belonging to the A and B population, respectively. TNcc-  
297 PP-38.1 was characterized by population A signature substitutions and acquisition of additional  
298 substitutions corresponding to the substitutions found with >80% frequency in TNcc-PP-38.1  
299 (Supplementary Table 4). Thus, subclonal analysis described in this section reflected results obtained  
300 by NGS analysis of polyclonal cell culture virus (Supplementary Table 3, 4 and 7).

301

302 Downstream processing of HCV for vaccine experiments

303 While the general protocol for HCV downstream processing is described in Materials and Methods /  
304 Supplementary Materials and Methods, this section describes the results obtained during downstream  
305 processing of genotype 1a, 2a and 3a vaccine viruses. Downstream processing was initiated with a  
306 first filter clarification step using filters with a pore size of 5µm and 0.65µm, followed by two TFF  
307 steps with two hollow fibers with different surface areas, which resulted in a volume reduction from  
308 ~16l to ~35ml. The resulting material had HCV infectivity titers of 7.5, 9.2 and 8.8 log<sub>10</sub> FFU/ml for  
309 genotype 1a, 2a and 3a HCV, respectively (Supplementary Figure 4). The resulting material was  
310 distributed into six different ultracentrifugation vials which were subjected to 3-cushion  
311 ultracentrifugation resulting in three fractions. Fraction 2 from each of the six vials (~1.2ml each)  
312 were pooled amounting to a total volume of ~7.5ml with HCV infectivity titers of 7.8, 9.5 and  
313 9.1log<sub>10</sub> FFU/ml for genotype 1a, 2a and 3a HCV, respectively (Supplementary Figure 4). This was  
314 followed by TFF using a small hollow fiber reducing the volume to ~2ml with infectivity titers of  
315 8.5, 11 and 9.6log<sub>10</sub> FFU/ml for genotype 1a, 2a and 3a HCV, respectively (Supplementary Figure

316 4). These samples were subjected to gradient ultracentrifugation; 18 fractions (~550µl each) were  
317 collected and weighed to determine their buoyant densities. The three fractions with densities closest  
318 to 1.1g/ml were pooled amounting to a total volume of ~1.5ml. These pools yielded infectivity titers  
319 of 7.8, 9.9 and 9.6 log<sub>10</sub> FFU/ml for genotype 1a, 2a and 3a HCV, respectively (Supplementary  
320 Figure 4). These pools were then subjected to Sephadex chromatography, where 12 fractions (~1ml  
321 each) were collected. Five of these fractions were pooled based on absorbance at OD of 230nm  
322 amounting to a total volume of ~4.8ml with infectivity titers of 7.4, 9.2 and 9.1 log<sub>10</sub> FFU/ml for  
323 genotype 1a, 2a and 3a HCV, respectively (Supplementary Figure 4). Thus, recoveries in downstream  
324 processing were 9%, 17% and 30% for genotype 1a, 2a and 3a HCV, respectively. The pools resulting  
325 from chromatography were UV inactivated to yield the final vaccine antigens. To confirm virus  
326 inactivation, replicate cell cultures were inoculated and maintained for three weeks; cells were split  
327 every 2-3 days, when replicate cultures for immunostaining for HCV antigen were plated, to confirm  
328 inactivation based on absence of HCV antigen positive cells (Supplementary Figure 5).

329 **Supplementary Figures**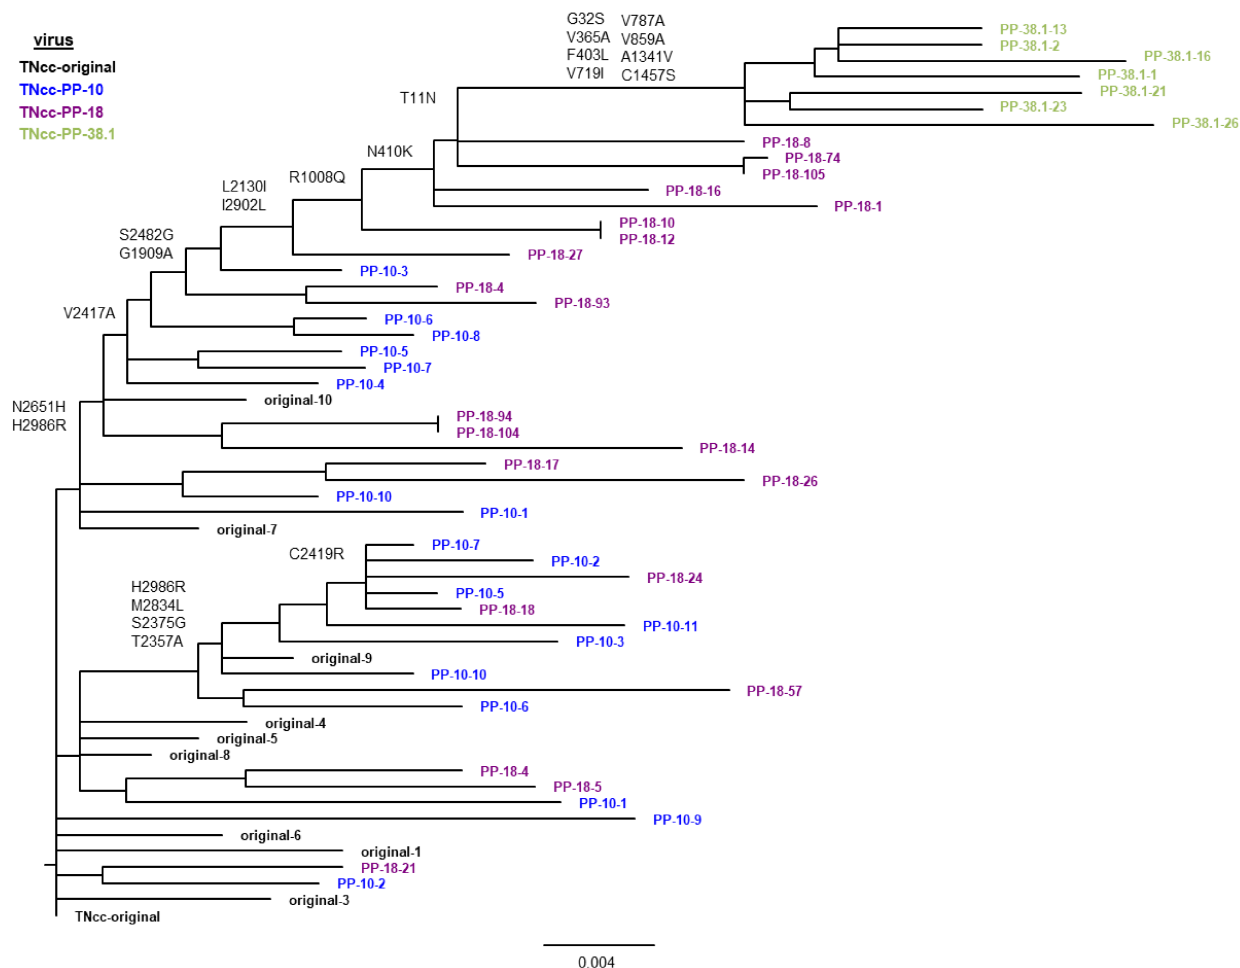

330

331 Supplementary Figure 1. Phylogenetic analysis of subclones of full ORF amplicons of polyclonal  
 332 passaged genotype 1a HCV. Phylogenetic analysis and ancestral reconstruction of subclones of RT-  
 333 PCR amplicons spanning the entire ORF of the original TNcc used as starting material for serial  
 334 passage experiments, TNcc-PP-10, TNcc-PP-18 and TNcc-PP-38.1 (Figure 1 and 2 and  
 335 Supplementary Table 3, 4 and 7). Respective subclones are designated PP-10-X, PP-18-X and PP-  
 336 38.1-X, with “X” being the subclone number.

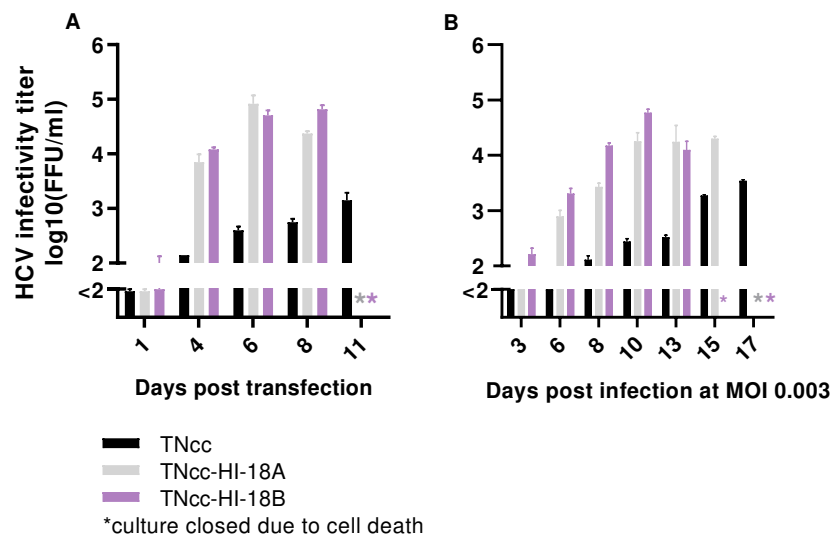

337

338 Supplementary Figure 2. HCV genotype 1a recombinants engineered based on an initial passage line  
 339 had increased viral fitness in cell culture. (A) Original TNcc and newly engineered TNcc-HI-18A and  
 340 TNcc-HI-18B HCV recombinants were transfected into Huh7.5 cells using the same amount of HCV  
 341 RNA *in vitro* transcripts. (B) First passage kinetic experiments were inoculated at MOI 0.003 with  
 342 TNcc and HI-viruses using supernatants derived from the transfection experiment when peak  
 343 infectivity titers were observed. Cultures were split every 2-3 days. On these days HCV infectivity  
 344 titers given in log<sub>10</sub> FFU/ml were determined with an infectivity titration assay as means of three  
 345 replicates with standard deviation (SD). \*, cell culture was closed due to HCV induced cell death.

346

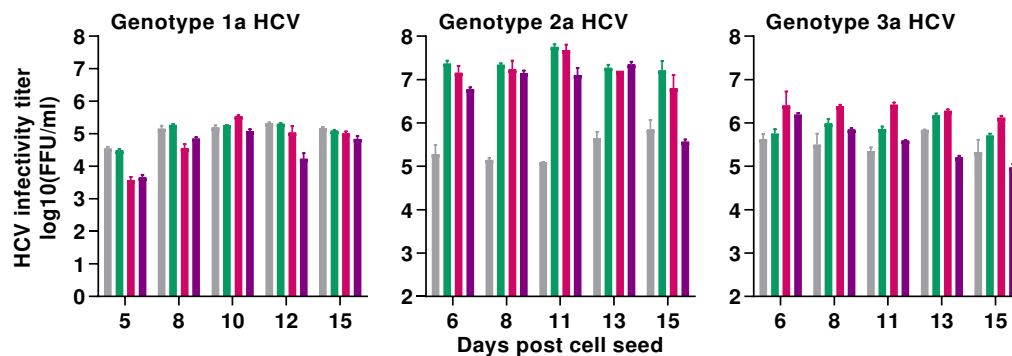

347

348 Supplementary Figure 3. Production of genotype 1a, 2a, and 3a vaccine viruses. Huh7.5 cells were  
349 infected with genotype 1a, 2a and 3a HCV seed stocks at MOI 0.003 and transferred to 10-layer cell-  
350 factories. For each genotype four cell-factories were processed as indicated by different colors. Per  
351 cell-factory, five harvests of 800ml supernatant were collected at the indicated days post cell seed  
352 into the cell-factory. HCV infectivity titers in harvests were determined as log<sub>10</sub> FFU/ml and are  
353 means of three replicates with SD. Thus, per virus 16l HCV containing supernatant were produced  
354 and pooled for further processing.

14

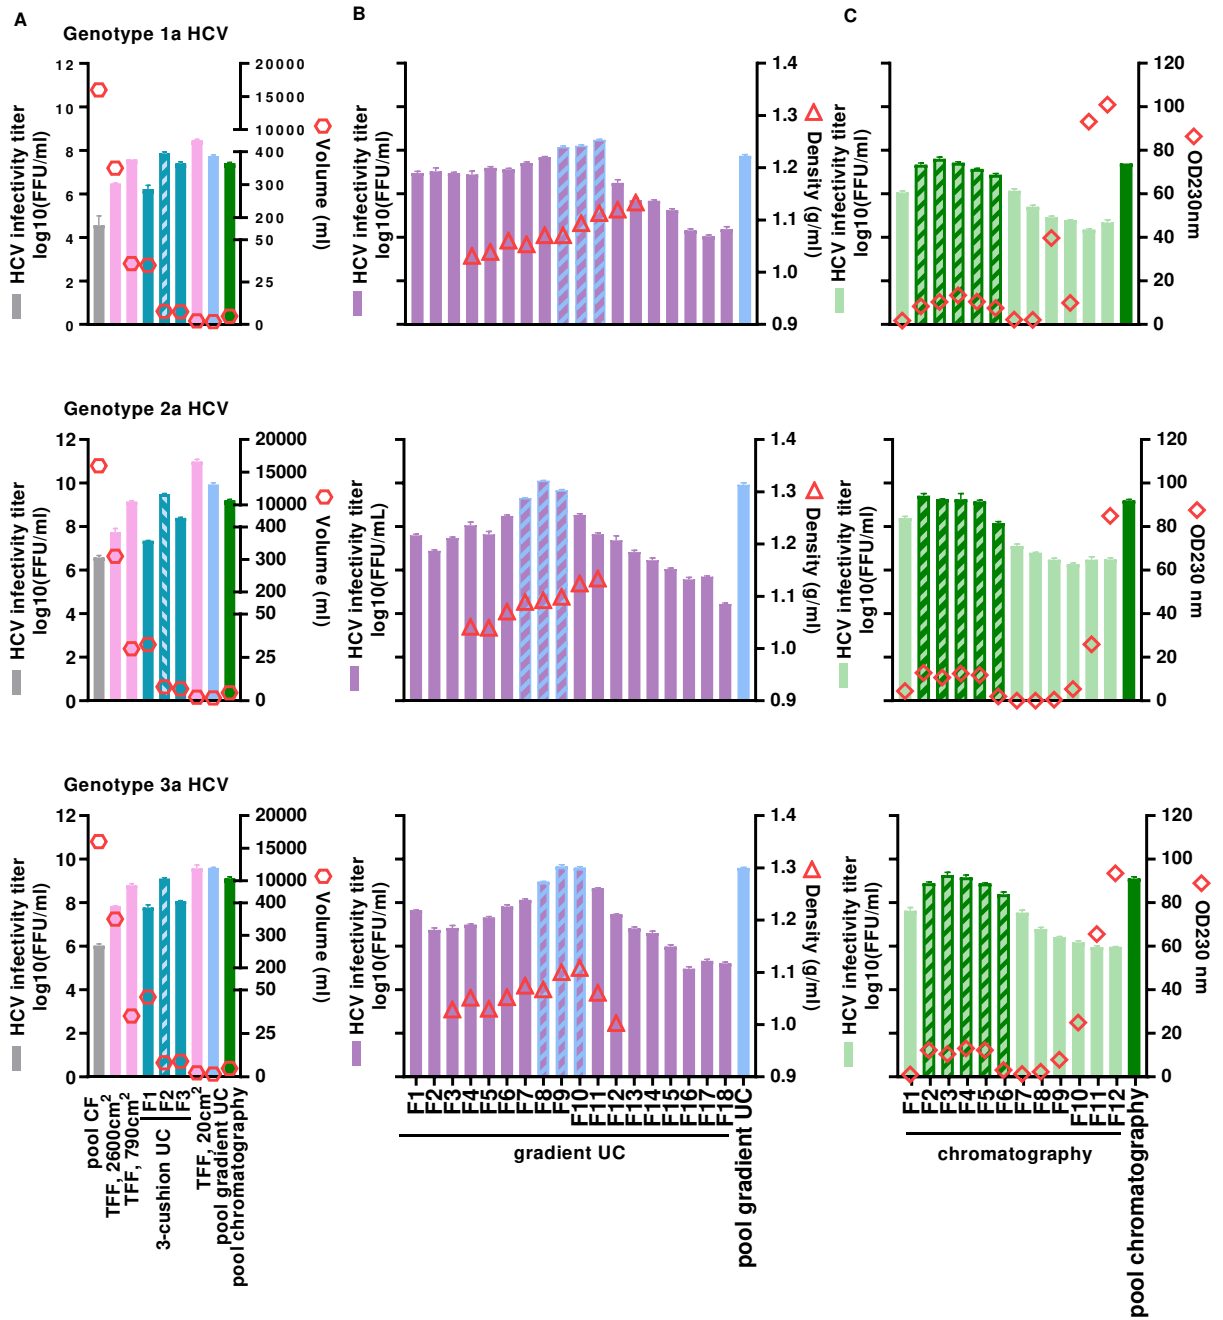

355

356 Supplementary Figure 4. Downstream processing of cell culture produced genotype 1a, 2a and 3a  
 357 HCV. For each of genotype 1a, 2a and 3a HCV, ~16l of pooled virus containing cell culture  
 358 supernatant produced in cell-factories were concentrated for vaccine production. (A) HCV infectivity  
 359 titers (left y-axis) and volumes (right y-axis) of material from the different processing steps: pool CF,

360 pooled supernatant from cell-factories; TFF, 2600cm<sup>2</sup> and TFF, 790cm<sup>2</sup>, TFF with hollow fibers with  
361 specified surface area; 3-cushion UC F1, F2 and F3, fraction 1, 2 and 3 from 3-cushion  
362 ultracentrifugation with the striped bar indicating F2 subjected to further processing; TFF, 20cm<sup>2</sup>,  
363 TFF with hollow fiber with specified surface area; pool gradient UC, pool of 3 fractions selected from  
364 fraction 7-11 shown in B; pool chromatography, pool of fractions selected from fraction 2-6 shown  
365 in C. (B) HCV infectivity titers (left y-axis) and buoyant densities (right y-axis) of 18 fractions  
366 collected following equilibrium gradient ultracentrifugation (gradient UC). Striped bars indicate the  
367 fractions that were pooled for further processing (pool gradient UC, same samples also shown in A).  
368 (C) HCV infectivity titers (left y-axis) and OD<sub>230nm</sub> determinations (right y-axis) for 12 fractions  
369 collected during Sephadex chromatography. Striped bars indicate the fractions that were pooled prior  
370 to UV inactivation (pool chromatography, samples also shown in A). (A-C) HCV infectivity titers  
371 are given as log<sub>10</sub> FFU/ml and as means of three replicates with SD. For buoyant density and OD  
372 determination, a single measurement was done.



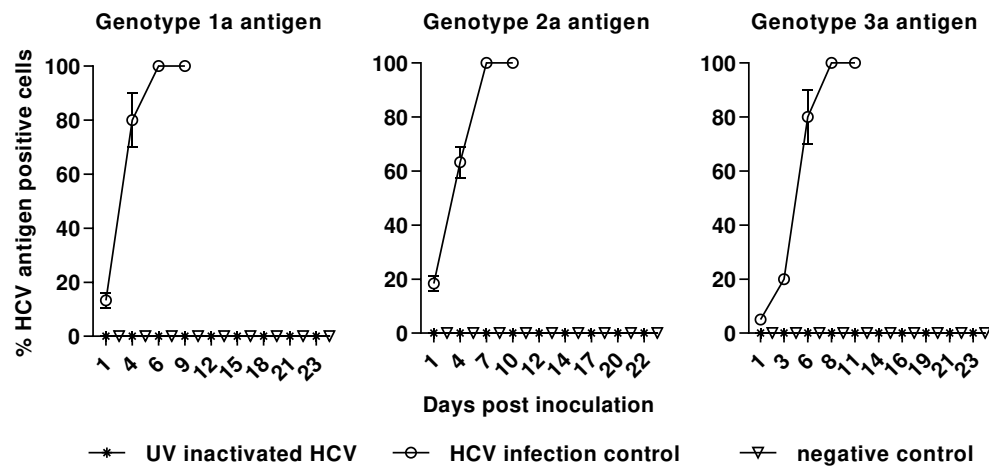

373

374 Supplementary Figure 5. Absence of HCV antigen positive cells in cell cultures inoculated with UV  
 375 inactivated HCV. Three Huh7.5 cell cultures plated the previous day at 80000 cells per well in a 24-  
 376 well dish, were inoculated with 100µl of UV irradiated HCV of the specified genotype. Positive HCV  
 377 infection control cultures were inoculated with a genotype 5a HCV<sup>31</sup> at an MOI that resulted in robust  
 378 infection. Negative control cultures were not inoculated. Cultures inoculated with irradiated HCV  
 379 and negative control cultures were followed for 3 weeks by splitting every 2-3 days and determination  
 380 of the percentage of HCV antigen positive cells by immunostaining for HCV core and NS5A. HCV  
 381 infection control cultures were followed until peak of infection. Percentages of HCV antigen positive  
 382 cells are means of immunostainings from three replicate cell cultures with SD. For the negative  
 383 control datapoints are nudged by 0.5 units in the x-axis direction.

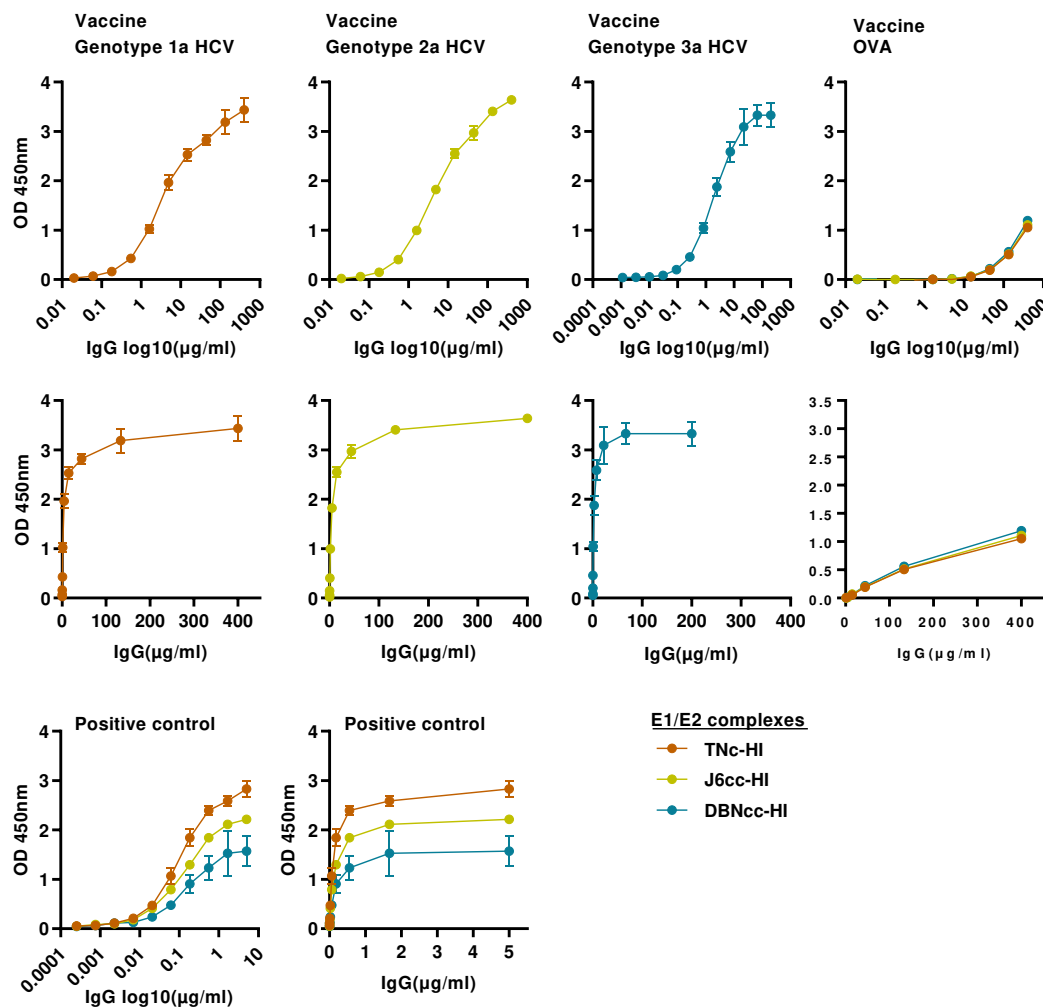

384

385 Supplementary Figure 6. Immunization with inactivated genotype 1a, 2a or 3a HCV elicited IgG  
 386 binding to HCV envelope proteins approaching a binding plateau. Binding capacity of pooled purified  
 387 serum IgG from mice immunized with inactivated genotype 1a, 2a or 3a HCV or OVA to E1/E2  
 388 complexes of the homologous HI-recombinants was evaluated by ELISA. Values are OD reads at  
 389 450nm following subtraction of mean OD of 8 negative controls. Datapoints are means of two  
 390 replicates with SD. Positive controls: Instead of serum IgG, well-characterized primary antibodies  
 391 were used: AP33<sup>38</sup> for binding to TNcc-HI and DBNcc-HI E1/E2 and H77.39<sup>39</sup> for binding to J6cc-  
 392 HI E1/E2. Negative controls: No IgG was used and TNcc-HI, J6cc-HI and DBNcc-HI E1/E2 were  
 393 incubated with secondary antibody only; for negative controls, OD reads were ~0.05. Data are shown

18

394 either with logarithmic or linear x axis. Compared to Figure 8, higher IgG concentrations were used  
395 to evaluate if a binding plateau could be approached.

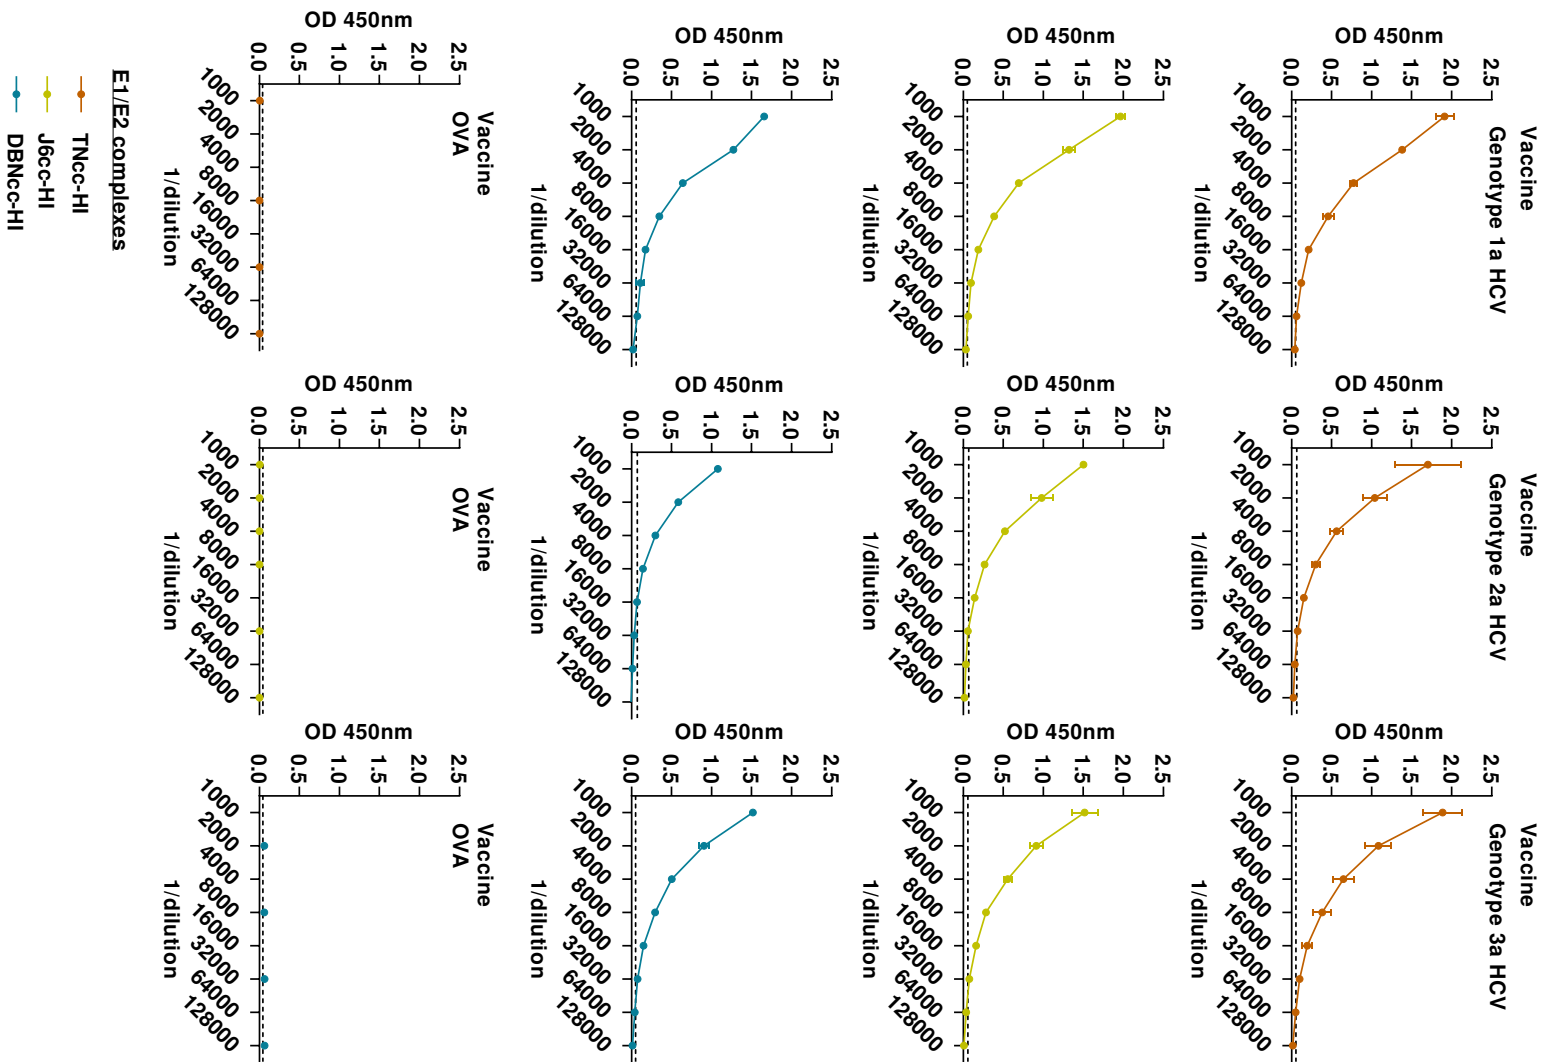

397 Supplementary Figure 7. Immune-sera binding to HCV envelope proteins and determination of  
398 endpoint titers. Binding capacity of immune-sera from mice immunized with inactivated genotype  
399 1a, 2a or 3a HCV or OVA to E1/E2 complexes of the specified HI-recombinants was evaluated by  
400 ELISA. Values are OD reads at 450nm following subtraction of mean OD of 8 negative controls.  
401 Datapoints are means of two replicates with SD. Negative controls: No immune-sera were used and  
402 TNcc-HI, J6cc-HI and DBNcc-HI E1/E2 were incubated with secondary antibody only; for negative  
403 controls, OD reads were ~0.05. Broken-lines: 2-fold mean OD of negative controls, used as cut-off  
404 for determination of endpoint titers.

405 **Supplementary Tables**

406 Supplementary Table 1. Primers for reverse transcription for generation of full-length HCV ORF  
407 amplicons.

| 3' cDNA primers | Target virus        | Primer sequence (5'-3') |
|-----------------|---------------------|-------------------------|
| 1a-9405-RT      | 1a(TNcc, TNcc-HI)   | TAAGAGGCCGGAGTGTTTAC    |
| 2a-9481-RT      | 2a(J6cc, J6cc-HI)   | CTATGGAGGTACCTAGTGTGTGC |
| 3a-9435-RT      | 3a(DBNcc, DBNcc-HI) | AAAAGAATGGAGTGTTAT      |

408

409 Supplementary Table 2. Primers for PCR for generation of full-length HCV ORF amplicons and  
410 amplicons spanning E1/E2.

| Primers   | Target virus        | Primer sequence (5'-3')     |
|-----------|---------------------|-----------------------------|
| 1a-209-F  | 1a(TNcc, TNcc-HI)   | TGCCTGATAGGGTGCTTGCG        |
| 1a-9402-R | 1a(TNcc, TNcc-HI)   | AGGCCGGAGTGTTACCCCA         |
| 1a-3285R  | 1a(TNcc, TNcc-HI)   | TGGTCTCCATCTGGGAAAAG        |
| 2a-303-F  | 2a(J6cc, J6cc-HI)   | CTTGCGAGTGCCCCGGGAGG        |
| 2a-9467-R | 2a(J6cc, J6cc-HI)   | TGGAGGTACCTAGTGTGTGCCGCTC   |
| 2a-3774-R | 2a(J6cc, J6cc-HI)   | GGGATGACATCAGCGTTCGCGTGAC   |
| 3a-293-F  | 3a(DBNcc, DBNcc-HI) | GATAGGGTGCTTGCGAGTGCC       |
| 3a-9432-R | 3a(DBNcc, DBNcc-HI) | AGAATGGAGTGTTATCCTACCAGCTCA |
| 3a-3694R  | 3a(DBNcc, DBNcc-HI) | CTGGCCACCCAACRAGRTCCT       |

411

412 Supplementary Table 3. Coding nucleotide changes identified in polyclonal passaged genotype 1a  
 413 HCV from an initial passage line.

| HCV protein <sup>a</sup> | Nucleotide change <sup>b</sup> |                |        | Allele frequency (%) <sup>c</sup> |            |                      | AA change TNcc reference <sup>d</sup> | Engineered construct <sup>e</sup> |             |
|--------------------------|--------------------------------|----------------|--------|-----------------------------------|------------|----------------------|---------------------------------------|-----------------------------------|-------------|
|                          | TNcc position                  | TNcc reference | change | TNcc-PP-10                        | TNcc-PP-18 | Gt 1a HCV seed stock |                                       | TNcc-HI-18A                       | TNcc-HI-18B |
| core                     | 373                            | C              | A      | 16                                | 26         | 41                   | T11N                                  |                                   |             |
|                          | 430                            | T              | C      | 7                                 | 12         | 11                   | I30T                                  |                                   |             |
| E2                       | 1571                           | C              | G      | 18                                | 27         | 42                   | N410K                                 |                                   |             |
|                          | 2464                           | G              | A      | 11                                | 29         | 16                   | S708N                                 |                                   |             |
| NS2                      | 2822                           | G              | A      | 5                                 | 16         | 24                   | M827I                                 |                                   |             |
|                          | 2895                           | A              | G      | 17                                | 30         | 15                   | R852G                                 |                                   |             |
|                          | 2935                           | A              | C      | 1                                 | 14         | 21                   | N865T                                 |                                   |             |
|                          | 3364                           | G              | A      | 18                                | 28         | 44                   | R1008Q                                |                                   |             |
| NS3                      | 3804                           | C              | G      | 20                                | 33         | 15                   | P1155A                                |                                   |             |
|                          | 3978                           | A              | T      | 2                                 | 10         | 23                   | N1213Y                                |                                   |             |
|                          | 4848                           | G              | A      | 5                                 | 10         | 10                   | A1503T                                |                                   |             |
| NS4B                     | 5812                           | G              | A      | 15                                | 5          | 12                   | G1824D                                |                                   |             |
|                          | 6067                           | G              | C      | 25                                | 36         | 59                   | G1909A                                |                                   |             |
| NS5A                     | 6729                           | C              | A      | 4                                 | 24         | 40                   | L2130I                                |                                   |             |
|                          | 7296                           | C              | T      | 5                                 | 15         | 23                   | P2319S                                |                                   |             |
|                          | 7410                           | A              | G      | 24                                | 34         | 17                   | T2357A                                |                                   | x           |
|                          | 7464                           | A              | G      | 29                                | 45         | 27                   | S2375G                                |                                   | x           |
|                          | 7588                           | A              | G      | 9                                 | 20         | 23                   | D2416G                                |                                   |             |
|                          | 7591                           | T              | C      | 32                                | 34         | 46                   | V2417A                                |                                   |             |
|                          | 7596                           | T              | C      | 25                                | 43         | 29                   | C2419R                                |                                   | x           |
| NS5B                     | 7785                           | A              | G      | 18                                | 29         | 43                   | S2482G                                | x                                 |             |
|                          | 8292                           | A              | C      | 61                                | 60         | 80                   | N2651H                                | x                                 |             |
|                          | 8841                           | A              | T      | 29                                | 38         | 20                   | M2834L                                |                                   | x           |
|                          | 8901                           | A              | C      | 5                                 | 11         | 11                   | I2854L                                |                                   |             |
|                          | 8985                           | A              | C      | 9                                 | 18         | 24                   | I2882L                                |                                   |             |
|                          | 9045                           | A              | C      | 7                                 | 27         | 43                   | I2902L                                | x                                 |             |
|                          | 9298                           | A              | G      | 72                                | 96         | 98                   | H2986R                                | x                                 | x           |

414

415 <sup>a</sup>, HCV protein, in which specified change was located.

416 <sup>b</sup>, Nucleotide change specified by nucleotide position and identity relating to the TNcc genome  
 417 (Genbank accession number JX993348) as a reference.<sup>26</sup> Coding changes with allele frequency of at  
 418 least 10% in one of the analyzed samples are listed.

419 <sup>c</sup>, Allele frequency of the identified nucleotide change. Polyclonal passage 10 (TNcc-PP-10) and 18  
 420 (TNcc-PP-18) viruses from the initial passage line (Figure 1), and the seed stock used for vaccine  
 421 production (Gt 1a HCV seed stock) were analyzed.

422 <sup>d</sup>, Amino acid change specified by amino acid position and identity relating to the TNcc polyprotein;  
423 amino acid position numbers are identical to position numbers in relation to the reference H77  
424 polyprotein (Genbank accession number AF009606).  
425 <sup>e</sup>, x indicates that the respective nucleotide change was engineered for generation of TNcc-HI-18A  
426 and TNcc-HI-18B, respectively.



427 Supplementary Table 4. Coding nucleotide changes identified in polyclonal passaged genotype 1a  
 428 HCV from a later passage line.

| HCV protein <sup>a</sup> | Nucleotide change <sup>b</sup> |                |        | Allele frequency (%) <sup>c</sup> | AA change TNcc reference <sup>d</sup> | Engineered construct <sup>e</sup> |
|--------------------------|--------------------------------|----------------|--------|-----------------------------------|---------------------------------------|-----------------------------------|
|                          | TNcc position                  | TNcc reference | change |                                   |                                       |                                   |
|                          | TNcc-PP-38.1                   |                |        |                                   |                                       | TNcc-HI                           |
| core                     | 373                            | C              | A      | 97                                | T11N                                  | x                                 |
|                          | 435                            | G              | A      | 48                                | G32S                                  | x                                 |
|                          | 756                            | C              | A      | 17                                | L139I                                 |                                   |
| E1                       | 1435                           | T              | C      | 99                                | V365A                                 | x                                 |
| E2                       | 1548                           | T              | C      | 99                                | F403L                                 | x                                 |
|                          | 1571                           | C              | G      | 100                               | N410K                                 | x                                 |
|                          | 2496                           | G              | A      | 100                               | V719I                                 | x                                 |
| p7                       | 2701                           | T              | C      | 92                                | V787A                                 | x                                 |
| NS2                      | 2917                           | T              | C      | 100                               | V859A                                 | x                                 |
|                          | 3364                           | G              | A      | 100                               | R1008Q                                | x                                 |
| NS3                      | 4267                           | C              | T      | 15                                | A1309V                                |                                   |
|                          | 4363                           | C              | T      | 100                               | A1341V                                | x                                 |
|                          | 4711                           | G              | C      | 99                                | C1457S                                | x                                 |
| NS4B                     | 6067                           | G              | C      | 100                               | G1909A                                | x                                 |
| NS5A                     | 6729                           | C              | A      | 100                               | L2130I                                | x                                 |
|                          | 7591                           | T              | C      | 100                               | V2417A                                | x                                 |
| NS5B                     | 7785                           | A              | G      | 99                                | S2482G                                | x                                 |
|                          | 8292                           | A              | C      | 99                                | N2651H                                | x                                 |
|                          | 9045                           | A              | C      | 100                               | I2902L                                | x                                 |
|                          | 9298                           | A              | G      | 99                                | H2986R                                | x                                 |

429

430 <sup>a</sup>, HCV protein in which specified change was located.

431 <sup>b</sup>, Nucleotide change specified by nucleotide position and identity relating to the TNcc genome  
 432 (Genbank accession number JX993348) as a reference.<sup>26</sup> Coding changes with allele frequency of at  
 433 least 10% in one of the analyzed samples are listed.

434 <sup>c</sup>, Allele frequency of the identified nucleotide change. Polyclonal passage 38.1 (TNcc-PP-38.1) virus  
 435 from the later passage line was analyzed (Figure 1).

436 <sup>d</sup>, Amino acid change specified by amino acid position and identity relating to the TNcc polyprotein;  
 437 amino acid position numbers are identical to position numbers in relation to the reference H77  
 438 polyprotein (Genbank accession number AF009606).

439 <sup>e</sup>, x indicates that the respective nucleotide change was engineered for generation of TNcc-HI.

440 Supplementary Table 5. Coding nucleotide changes identified in polyclonal passaged genotype 2a  
441 HCV.

| HCV Protein <sup>a</sup> | Nucleotide change <sup>b</sup> |                |        | Allele frequency (%) <sup>c</sup> | AA change J6cc reference <sup>d</sup> | AA position H77 reference <sup>e</sup> | Engineered construct <sup>f</sup> |   |
|--------------------------|--------------------------------|----------------|--------|-----------------------------------|---------------------------------------|----------------------------------------|-----------------------------------|---|
|                          | J6cc position                  | J6cc reference | change |                                   |                                       |                                        |                                   |   |
|                          |                                |                |        | Gt 2a HCV seed stock              |                                       |                                        |                                   |   |
|                          |                                |                |        | J6cc-PP-35                        |                                       |                                        | J6cc-HI                           |   |
| core                     | 572                            | A              | G      | 99                                | 99                                    | K78E                                   | 78                                | x |
|                          | 758                            | G              | C      | 81                                | 81                                    | V140L                                  | 140                               | x |
| E1                       | 1325                           | A              | T      | 100                               | 100                                   | T329S                                  | 329                               | x |
| E2                       | 1583                           | A              | G      | 14                                | 14                                    | N415D                                  | 415                               |   |
|                          | 1640                           | C              | A      | 100                               | 100                                   | H434N                                  | 434                               | x |
|                          | 2063                           | G              | A      | 83                                | 83                                    | A575T                                  | 573                               | x |
| p7                       | 2618                           | G              | A      | 94                                | 94                                    | A760T                                  | 756                               | x |
|                          | 2658                           | T              | C      | 94                                | 94                                    | V773A                                  | 769                               | x |
| NS2                      | 2823                           | T              | C      | 93                                | 93                                    | V828A                                  | 824                               | x |
|                          | 2913                           | A              | C      | 17                                | 17                                    | E858A                                  | 854                               |   |
| NS3                      | 3777                           | C              | T      | 82                                | 82                                    | A1146V                                 | 1142                              | x |
|                          | 4328                           | A              | G      | 100                               | 100                                   | I1330V                                 | 1326                              | x |
|                          | 4839                           | T              | C      | 93                                | 93                                    | L1500P                                 | 1496                              | x |
| NS4B                     | 5843                           | G              | A      | 82                                | 82                                    | V1835I                                 | 1831                              | x |
| NS5A                     | 6338                           | A              | G      | 93                                | 93                                    | T2000A                                 | 1996                              | x |
|                          | 7428                           | T              | C      | 100                               | 92                                    | L2363P                                 | 2363                              | x |
|                          | 7439                           | G              | C      | 100                               | 100                                   | A2367P                                 | 2367                              | x |
|                          | 7661                           | T              | C      | 45                                | 45                                    | C2441R                                 | 2419                              |   |
| NS5B                     | 8687                           | G              | C      | 81                                | 81                                    | E2783Q                                 | 2761                              | x |
|                          | 9378                           | T              | C      | 95                                | 45                                    | L3013S                                 | 2991                              | x |

442

443 <sup>a</sup>, HCV protein in which specified change was located.

444 <sup>b</sup>, Nucleotide change specified by nucleotide position and identity relating to the J6cc genome  
445 (Genbank accession number JQ745650) as a reference.<sup>27</sup> Coding changes with allele frequency of at  
446 least 10% in one of the analyzed samples are listed.

447 <sup>c</sup>, Allele frequency of the identified nucleotide change. Polyclonal passage 35 (J6cc-PP-35) virus  
448 (Figure 1) and the seed stock used for vaccine production (Gt 2a HCV seed stock) were analyzed.

449 <sup>d</sup>, Amino acid change specified by amino acid position and identity relating to the J6cc polyprotein  
450 (Genbank accession number JQ745650).

451 <sup>e</sup>, Amino acid position relating to the H77 reference polyprotein (Genbank accession number  
452 AF009606).

453 <sup>f</sup>, x indicates that the respective nucleotide change was engineered for generation of J6cc-HI.

454

455 Supplementary Table 6. Coding nucleotide changes identified in polyclonal passaged genotype 3a  
456 HCV.

| HCV protein <sup>a</sup> | Nucleotide change <sup>b</sup> |                   |        | Allele frequency (%) <sup>c</sup> |                      | AA change DBN3acc reference <sup>d</sup> | AA position H77 reference <sup>e</sup> | Engineered construct <sup>f</sup> |
|--------------------------|--------------------------------|-------------------|--------|-----------------------------------|----------------------|------------------------------------------|----------------------------------------|-----------------------------------|
|                          | DBN3acc position               | DBN3acc reference | change | DBNcc-PP-16                       | Gt 3a HCV seed stock |                                          |                                        |                                   |
| E2                       | 1522                           | G                 | A      | 97                                | 100                  | G395R                                    | 395                                    | x                                 |
| NS2                      | 2905                           | G                 | A      | 96                                | 100                  | A856T                                    | 849                                    | x                                 |
|                          | 2962                           | G                 | A      | 97                                | 100                  | G875R                                    | 868                                    | x                                 |
| NS3                      | 5105                           | A                 | G      | 97                                | 100                  | N1589S                                   | 1582                                   | x                                 |
| NS4B                     | 5597                           | T                 | G      | 96                                | 100                  | I1753S                                   | 1746                                   | x                                 |
| NS5A                     | 7622                           | T                 | C      | 97                                | 100                  | V2428A                                   | 2417                                   | x                                 |
| NS5B                     | 8759                           | A                 | G      | 97                                | 100                  | D2807G                                   | 2796                                   | x                                 |

457

458 <sup>a</sup>, HCV protein in which specified change was located.

459 <sup>b</sup>, Nucleotide change specified by nucleotide position and identity relating to the DBN3acc genome  
460 (Genbank accession number KX280714) as a reference.<sup>28</sup> Coding changes with allele frequency of at  
461 least 10% in one of the analyzed samples are listed.

462 <sup>c</sup>, Allele frequency of the identified nucleotide change. Polyclonal passage 16 (DBNcc-PP-16) virus  
463 (Figure 1) and the seed stock used for vaccine production (Gt 3a HCV seed stock) were analyzed.

464 <sup>d</sup>, Amino acid change specified by amino acid position and identity relating to the DBN3acc  
465 polyprotein (Genbank accession number KX280714).

466 <sup>e</sup>, Amino acid position relating to the H77 reference polyprotein (Genbank accession number  
467 AF009606).

468 <sup>f</sup>, x indicates that the respective nucleotide change was engineered for generation of DBNcc-HI.

469 Supplementary Table 7. Subclonal analysis of polyclonal passaged genotype 1a HCV from a later  
470 passage line.

| HCV protein <sup>a</sup>              | core |      |      |       | E1    |       | E2    |       |       |       |       |       |       |
|---------------------------------------|------|------|------|-------|-------|-------|-------|-------|-------|-------|-------|-------|-------|
| Nucleotide position <sup>b</sup>      | 373  | 435  | 463  | 756   | 1188  | 1435  | 1497  | 1512  | 1548  | 1571  | 1842  | 2232  | 2496  |
| TNcc reference                        | C    | G    | G    | C     | T     | T     | T     | A     | T     | C     | A     | A     | G     |
| Nucleotide change                     | A    | A    | C    | A     | C     | C     | C     | G     | C     | G     | G     | G     | A     |
| Allele frequency (%) <sup>c</sup>     | 97   | 48   | nd   | 17    | nd    | 99    | 6     | 9     | 99    | 100   | nd    | nd    | 100   |
| # Subclones <sup>d</sup>              |      |      |      |       |       |       |       |       |       |       |       |       |       |
| 1                                     | x    | x    |      |       |       | x     |       |       | x     | x     |       |       | x     |
| 2                                     | x    | x    |      |       |       | x     |       |       | x     | x     |       |       | x     |
| 3                                     | x    | x    |      |       | x     | x     |       |       | x     | x     |       |       | x     |
| 4                                     | x    | x    |      |       |       | x     |       |       | x     | x     | x     |       | x     |
| 5                                     | x    |      |      | x     |       | x     |       | x     | x     | x     |       | x     | x     |
| 6                                     | x    | x    |      |       |       | x     |       | x     | x     | x     |       |       | x     |
| 7                                     | x    | x    | x    | x     |       | x     | x     |       | x     | x     |       |       | x     |
| AA change TNcc reference <sup>e</sup> | T11N | G32S | G41A | L139I | S283P | V365A | Y386H | S391G | F403L | N410K | S501G | M631V | V719I |
| Engineered construct <sup>f</sup>     | x    | x    |      |       |       | x     |       |       | x     | x     |       |       | x     |

| HCV protein <sup>a</sup>              | p7    |       | NS2   |       |        | NS3    |        |        |        |        |        |        |        |
|---------------------------------------|-------|-------|-------|-------|--------|--------|--------|--------|--------|--------|--------|--------|--------|
| Nucleotide position <sup>b</sup>      | 2650  | 2701  | 2917  | 2959  | 3364   | 3876   | 3907   | 4071   | 4138   | 4267   | 4363   | 4711   | 5130   |
| TNcc reference                        | T     | T     | T     | T     | G      | T      | T      | T      | C      | C      | C      | G      | G      |
| Nucleotide change                     | C     | C     | C     | C     | A      | A      | G      | C      | G      | T      | T      | C      | A      |
| Allele frequency (%) <sup>c</sup>     | 1     | 92    | 100   | 8     | 100    | nd     | nd     | nd     | nd     | 15     | 100    | 99     | nd     |
| # Subclones <sup>d</sup>              |       |       |       |       |        |        |        |        |        |        |        |        |        |
| 1                                     |       | x     | x     |       | x      | x      |        |        |        |        | x      | x      |        |
| 2                                     |       | x     | x     | x     | x      |        |        |        |        |        | x      | x      |        |
| 3                                     | x     | x     | x     |       | x      |        | x      | x      |        |        | x      | x      |        |
| 4                                     |       | x     | x     |       | x      |        |        |        |        |        | x      | x      |        |
| 5                                     |       | x     | x     |       | x      |        |        |        |        |        | x      | x      | x      |
| 6                                     |       | x     | x     |       | x      |        |        |        |        |        | x      | x      |        |
| 7                                     |       | x     | x     |       | x      |        |        |        | x      |        | x      | x      |        |
| AA change TNcc reference <sup>e</sup> | V770A | V787A | V859A | V873A | R1008Q | L1179I | V1189G | Y1244H | A1266G | A1309V | A1341V | C1457S | A1597T |
| Engineered construct <sup>f</sup>     |       | x     | x     |       | x      |        |        |        |        |        | x      | x      |        |

| HCV protein <sup>a</sup>              | NS4B   |        | NS5A   |        |        |        |        |        |        |        |        |
|---------------------------------------|--------|--------|--------|--------|--------|--------|--------|--------|--------|--------|--------|
| Nucleotide position <sup>b</sup>      | 5575   | 6067   | 6315   | 6729   | 7288   | 7386   | 7404   | 7407   | 7422   | 7500   | 7591   |
| TNcc reference                        | T      | G      | A      | C      | T      | A      | T      | T      | A      | T      | T      |
| Nucleotide change                     | C      | C      | G      | A      | A      | T      | C      | C      | T      | C      | C      |
| Allele frequency (%) <sup>c</sup>     | 1      | 100    | nd     | 100    | nd     | nd     | 1      | 6      | 0.4    | nd     | 100    |
| # Subclones <sup>d</sup>              |        |        |        |        |        |        |        |        |        |        |        |
| 1                                     |        | x      |        | x      |        |        | x      |        |        |        | x      |
| 2                                     |        | x      |        | x      |        | x      |        |        |        |        | x      |
| 3                                     |        | x      | x      | x      |        |        |        |        |        |        | x      |
| 4                                     |        | x      |        | x      |        |        |        |        |        | x      | x      |
| 5                                     |        | x      |        | x      | x      |        |        |        |        |        | x      |
| 6                                     |        | x      |        | x      |        |        |        | x      |        |        | x      |
| 7                                     | x      | x      |        | x      |        |        |        |        | x      |        | x      |
| AA change TNcc reference <sup>e</sup> | V1745A | G1909A | K1992E | L2130I | L2316H | T2349S | S2355P | S2356P | T2361S | S2387P | V2417A |
| Engineered construct <sup>f</sup>     |        | x      |        | x      |        |        |        |        |        |        | x      |

| HCV protein <sup>a</sup>              | NS5B   |        |        |        |        |        |
|---------------------------------------|--------|--------|--------|--------|--------|--------|
| Nucleotide position <sup>b</sup>      | 7785   | 7993   | 8292   | 8779   | 9045   | 9298   |
| TNcc reference                        | A      | T      | A      | C      | A      | A      |
| Nucleotide change                     | G      | C      | C      | T      | C      | G      |
| Allele frequency (%) <sup>c</sup>     | 99     | nd     | 99     | nd     | 100    | 99     |
| # Subclones <sup>d</sup>              |        |        |        |        |        |        |
| 1                                     | x      | x      | x      |        | x      | x      |
| 2                                     | x      |        | x      |        | x      | x      |
| 3                                     | x      |        | x      |        | x      | x      |
| 4                                     | x      |        | x      |        | x      | x      |
| 5                                     | x      |        | x      |        | x      | x      |
| 6                                     | x      |        | x      |        | x      | x      |
| 7                                     | x      |        | x      | x      | x      | x      |
| AA change TNcc reference <sup>e</sup> | S2482G | V2551A | N2651H | A2813V | I2902L | H2986R |
| Engineered construct <sup>f</sup>     | x      |        | x      |        | x      | x      |

471

472 <sup>a</sup>, HCV protein, in which specified change was located.473 <sup>b</sup>, Nucleotide position, identity and change relating to the TNcc genome (Genbank accession number  
474 JX993348).<sup>26</sup> Coding changes occurring in at least one subclone are listed.475 <sup>c</sup>, Allele frequency of the identified nucleotide change in TNcc-PP-38.1 as determined by NGS  
476 (Supplementary Table 4). nd, not detected in NGS.477 <sup>d</sup>, Number of subclone. x, indicates presence of the respective change. Grey shadings indicate which  
478 subclone fragments were used for construction of the engineered construct.

- 479 <sup>e</sup>, Amino acid change specified by amino acid position, identity and change relating to the TNcc  
480 polyprotein (Genbank accession number JX993348).
- 481 <sup>f</sup>, x, indicates that the respective nucleotide change was engineered for generation of TNcc-HI.

482 Supplementary Table 8. Subclonal analysis of polyclonal passaged genotype 2a HCV.

| HCV protein <sup>a</sup>              | core |      |      |     |      |       |       |       |       |       | E1    |       |       |
|---------------------------------------|------|------|------|-----|------|-------|-------|-------|-------|-------|-------|-------|-------|
| Nucleotide position <sup>b</sup>      | 382  | 383  | 405  | 527 | 572  | 758   | 830   | 845   | 872   | 908   | 1030  | 1118  | 1199  |
| J6cc reference                        | C    | A    | T    | C   | A    | G     | T     | T     | T     | T     | G     | A     | G     |
| Nucleotide change                     | A    | C    | C    | del | C    | C     | C     | A     | G     | A     | C     | G     | T     |
| Allele frequency (%) <sup>c</sup>     | nd   | nd   | nd   | nd  | 99   | 80    | nd    | nd    | nd    | nd    | nd    | nd    | 7     |
| # Subclones <sup>d</sup>              |      |      |      |     |      |       |       |       |       |       |       |       |       |
| 2                                     |      |      |      |     | x    | x     |       |       |       |       |       |       |       |
| 10                                    |      |      |      |     | x    | x     |       |       |       |       |       |       | x     |
| 11                                    |      |      | x    |     | x    | x     |       |       |       |       | x     |       |       |
| 13                                    |      |      |      |     | x    |       |       | x     |       |       |       |       |       |
| 14                                    |      |      |      |     | x    | x     |       |       |       |       |       |       |       |
| 18                                    |      |      |      |     | x    | x     |       |       |       |       |       |       |       |
| 19                                    |      |      |      |     | x    | x     |       |       |       | x     |       |       |       |
| 20                                    |      |      |      |     | x    | x     |       |       |       |       |       |       |       |
| 22                                    | x    | x    |      | x   | x    | x     |       |       | x     |       |       |       | x     |
| 26                                    |      |      |      |     | x    | x     |       |       |       |       | x     |       |       |
| 27                                    |      |      |      |     | x    | x     | x     |       |       |       |       |       |       |
| AA change J6cc reference <sup>e</sup> | N14K | T15P | V22A |     | K78E | V140L | F164L | L169I | L178V | S190T | E230D | T260A | A287S |
| Engineered construct <sup>f</sup>     |      |      |      |     | x    | x     |       |       |       |       |       |       |       |

| HCV protein <sup>a</sup>              | E1    |       |      |       | E2    |       |       |       |       |       |       |       |       |       |
|---------------------------------------|-------|-------|------|-------|-------|-------|-------|-------|-------|-------|-------|-------|-------|-------|
| Nucleotide position <sup>b</sup>      | 1318  | 1325  | 1418 | 1439  | 1536  | 1583  | 1590  | 1640  | 1940  | 2063  | 2126  | 2174  | 2228  | 2454  |
| J6cc reference                        | G     | A     | G    | G     | T     | A     | A     | C     | A     | G     | A     | C     | A     | T     |
| Nucleotide change                     | A     | T     | del  | C     | C     | G     | G     | A     | G     | A     | G     | A     | G     | A     |
| Allele frequency (%) <sup>c</sup>     | nd    | 100   | nd   | nd    | 4     | 12    | 4     | 99.8  | 8     | 82    | 2     | nd    | nd    | 3     |
| # Subclones <sup>d</sup>              |       |       |      |       |       |       |       |       |       |       |       |       |       |       |
| 2                                     |       | x     |      |       |       |       |       | x     |       | x     |       |       |       |       |
| 10                                    |       | x     |      |       |       |       |       | x     |       | x     |       |       |       |       |
| 11                                    |       | x     |      | x     |       |       |       | x     |       | x     |       |       |       |       |
| 13                                    |       | x     |      |       |       |       |       | x     |       | x     |       |       |       |       |
| 14                                    | x     | x     |      |       |       |       |       | x     |       | x     |       |       |       |       |
| 18                                    |       | x     |      |       | x     |       |       | x     |       | x     |       |       |       |       |
| 19                                    |       | x     |      |       |       | x     |       | x     |       | x     |       |       |       |       |
| 20                                    |       | x     |      |       |       |       |       | x     |       | x     |       | x     |       |       |
| 22                                    |       | x     |      |       |       |       | x     | x     | x     |       |       |       |       | x     |
| 26                                    |       | x     |      |       |       |       |       | x     |       | x     |       |       | x     |       |
| 27                                    |       | x     | x    |       |       | x     |       | x     |       | x     | x     |       |       |       |
| AA change J6cc reference <sup>e</sup> | W326* | T329S | na   | A367P | L399P | N415D | N417I | N434H | N532D | A575T | T596A | L612M | I630V | F705Y |
| Engineered construct <sup>f</sup>     |       | x     |      |       |       |       |       | x     |       | x     |       |       |       |       |

483

| HCV protein <sup>a</sup>              | p7    |       |       |      |       | NS2   |       |       |       |      |       |       |       |       |
|---------------------------------------|-------|-------|-------|------|-------|-------|-------|-------|-------|------|-------|-------|-------|-------|
| Nucleotide position <sup>b</sup>      | 2616  | 2618  | 2658  | 2685 | 2735  | 2823  | 2879  | 2904  | 2913  | 2984 | 3011  | 3160  | 3212  | 3295  |
| J6cc reference                        | A     | G     | T     | T    | T     | T     | T     | C     | A     | G    | G     | G     | A     | G     |
| Nucleotide change                     | G     | A     | C     | ins  | C     | C     | G     | T     | C     | del  | A     | C     | G     | C     |
| Allele frequency (%) <sup>c</sup>     | nd    | 93    | 93    | nd   | nd    | 92    | nd    | nd    | 15    | nd   | nd    | nd    | nd    | nd    |
| # Subclones <sup>d</sup>              |       |       |       |      |       |       |       |       |       |      |       |       |       |       |
| 2                                     |       | x     | x     |      |       | x     |       |       |       |      |       | x     |       |       |
| 10                                    |       | x     | x     |      |       | x     |       |       | x     |      |       |       |       |       |
| 11                                    |       | x     | x     |      |       | x     |       |       |       |      |       |       |       |       |
| 13                                    |       | x     | x     |      | x     | x     | x     |       |       | x    |       |       |       |       |
| 14                                    | x     | x     | x     |      |       | x     |       |       |       |      |       |       |       |       |
| 18                                    |       | x     | x     | x    |       | x     |       |       |       |      |       |       |       | x     |
| 19                                    |       | x     | x     |      |       | x     |       |       | x     |      |       |       | x     |       |
| 20                                    |       | x     | x     |      |       | x     |       |       |       |      |       |       |       |       |
| 22                                    |       |       |       |      |       |       |       | x     |       |      | x     |       |       |       |
| 26                                    |       | x     | x     |      |       | x     |       |       |       |      |       |       |       |       |
| 27                                    |       | x     | x     |      |       | x     |       |       | x     |      |       |       |       |       |
| AA change J6cc reference <sup>e</sup> | H759R | A760T | V773A | na   | S799P | V828A | L846V | T855I | E858A | na   | D891N | M940I | T958A | K985N |
| Engineered construct <sup>f</sup>     |       | x     | x     |      |       | x     |       |       |       |      |       |       |       |       |

| HCV protein <sup>a</sup>              | NS3    |        |        |        |        |        |        |        |        |      |      |        | NS4A   |
|---------------------------------------|--------|--------|--------|--------|--------|--------|--------|--------|--------|------|------|--------|--------|
| Nucleotide position <sup>b</sup>      | 3702   | 3705   | 3777   | 3870   | 4173   | 4328   | 4694   | 4839   | 5154   | 5157 | 5157 | 5208   | 5432   |
| J6cc reference                        | C      | A      | C      | G      | T      | A      | T      | T      | C      | C    | C    | T      | G      |
| Nucleotide change                     | T      | G      | T      | A      | C      | G      | C      | C      | T      | del  | ins  | C      | A      |
| Allele frequency (%) <sup>c</sup>     | nd     | nd     | 81     | nd     | nd     | 100    | nd     | 93     | nd     | nd   | nd   | nd     | 0.2    |
| # Subclones <sup>d</sup>              |        |        |        |        |        |        |        |        |        |      |      |        |        |
| 2                                     |        |        | x      |        |        | x      |        | x      | x      |      |      |        | x      |
| 10                                    |        |        | x      | x      |        | x      |        | x      |        |      |      |        |        |
| 11                                    | x      |        | x      |        |        | x      |        | x      |        |      |      | x      |        |
| 13                                    |        |        | x      |        | x      | x      |        | x      |        |      |      |        |        |
| 14                                    |        |        | x      |        |        | x      |        | x      |        |      |      |        |        |
| 18                                    |        |        | x      |        |        | x      |        | x      |        | x    |      |        |        |
| 19                                    |        | x      | x      |        |        | x      |        | x      |        |      | x    |        |        |
| 20                                    |        |        | x      |        |        | x      |        | x      |        |      |      |        |        |
| 22                                    |        |        | x      |        |        | x      |        | x      |        |      |      |        |        |
| 26                                    |        |        | x      |        |        | x      |        | x      |        |      |      |        |        |
| 27                                    |        |        | x      |        |        | x      | x      | x      |        |      |      |        |        |
| AA change J6cc reference <sup>e</sup> | T1121I | K1122R | A1146V | R1177K | I1278T | I1330V | F1452L | L1500P | P1605L | na   | na   | V1623A | V1698I |
| Engineered construct <sup>f</sup>     |        |        | x      |        |        | x      |        | x      |        |      |      |        |        |

484



| HCV protein <sup>a</sup>              | NS4B   |        |        |      |        |        |        |        | NS5A   |           |        |        |        |
|---------------------------------------|--------|--------|--------|------|--------|--------|--------|--------|--------|-----------|--------|--------|--------|
| Nucleotide position <sup>b</sup>      | 5562   | 5563   | 5571   | 5787 | 5796   | 5843   | 6078   | 6210   | 6338   | 6509-6694 | 6563   | 6581   | 6596   |
| J6cc reference                        | A      | G      | C      | T    | G      | G      | G      | T      | A      |           | G      | A      | A      |
| Nucleotide change                     | G      | C      | G      | ins  | A      | A      | A      | C      | G      | del       | T      | T      | G      |
| Allele frequency (%) <sup>c</sup>     | nd     | 0.1    | nd     | nd   | nd     | 81     | nd     | nd     | 92     | nd        | nd     | 9      | nd     |
| # Subclones <sup>d</sup>              |        |        |        |      |        |        |        |        |        |           |        |        |        |
| 2                                     |        |        |        |      |        | x      |        |        | x      |           |        |        |        |
| 10                                    |        |        |        |      |        | x      | x      |        | x      |           |        |        |        |
| 11                                    |        |        |        |      | x      | x      |        |        | x      |           |        |        |        |
| 13                                    |        |        |        |      |        | x      |        |        | x      | x         |        |        |        |
| 14                                    |        |        |        |      |        | x      |        |        | x      |           |        |        |        |
| 18                                    |        |        |        | x    |        | x      |        |        | x      |           |        |        |        |
| 19                                    |        |        | x      |      |        | x      |        |        | x      |           |        | x      |        |
| 20                                    | x      | x      |        |      |        | x      |        |        | x      |           |        | x      | x      |
| 22                                    |        |        |        |      |        | x      |        |        | x      | x         |        |        |        |
| 26                                    |        |        |        |      |        | x      |        |        | x      |           |        |        |        |
| 27                                    |        |        |        |      |        | x      |        | x      | x      |           |        |        |        |
| AA change J6cc reference <sup>e</sup> | Q1741R | Q1741H | S1744C | na   | W1819* | V1835I | G1913E | I1957T | T2000A | na        | V2075L | N2081Y | I2086V |
| Engineered construct <sup>f</sup>     |        |        |        |      |        | x      |        |        | x      |           |        |        |        |

| HCV protein <sup>a</sup>              | NS5A   |        |        |        |        |        |        |        |        |        |        |        |        |
|---------------------------------------|--------|--------|--------|--------|--------|--------|--------|--------|--------|--------|--------|--------|--------|
| Nucleotide position <sup>b</sup>      | 6639   | 6861   | 6951   | 7026   | 7059   | 7107   | 7122   | 7187   | 7204   | 7335   | 7358   | 7428   | 7436   |
| J6cc reference                        | A      | T      | G      | A      | A      | T      | A      | C      | G      | C      | A      | T      | G      |
| Nucleotide change                     | G      | C      | T      | C      | G      | C      | G      | T      | T      | G      | G      | C      | T      |
| Allele frequency (%) <sup>c</sup>     | 2      | nd     | nd     | nd     | nd     | nd     | nd     | 1      | nd     | nd     | nd     | 92     | nd     |
| # Subclones <sup>d</sup>              |        |        |        |        |        |        |        |        |        |        |        |        |        |
| 2                                     |        |        |        |        | x      |        |        |        |        |        | x      | x      |        |
| 10                                    |        | x      |        |        |        |        |        |        |        |        |        | x      |        |
| 11                                    |        |        |        |        |        |        |        | x      |        |        |        | x      |        |
| 13                                    |        | x      |        | x      |        |        |        |        |        |        |        | x      |        |
| 14                                    |        |        | x      |        |        |        |        |        |        |        |        | x      |        |
| 18                                    |        |        |        |        |        |        | x      |        |        |        |        | x      |        |
| 19                                    |        |        |        |        |        |        |        |        |        |        |        | x      |        |
| 20                                    | x      |        |        |        |        |        |        |        |        |        |        | x      |        |
| 22                                    |        |        |        |        |        |        |        |        | x      |        |        | x      | x      |
| 26                                    |        |        |        |        |        |        |        |        |        |        |        | x      |        |
| 27                                    |        |        |        |        |        | x      |        |        |        | x      |        | x      |        |
| AA change J6cc reference <sup>e</sup> | H2100R | V2174A | S2204I | D2229A | D2240G | L2256P | E2261G | P2283S | W2289C | T2332R | I2340V | L2363P | G2366W |
| Engineered construct <sup>f</sup>     |        |        |        |        |        |        |        |        |        |        |        | x      |        |

485

| HCV protein <sup>a</sup>              | NS5A   |      |      |        |        |        |        | NS5B   |      |        |        |        |      |        |        |
|---------------------------------------|--------|------|------|--------|--------|--------|--------|--------|------|--------|--------|--------|------|--------|--------|
| Nucleotide position <sup>b</sup>      | 7439   | 7523 | 7586 | 7625   | 7640   | 7649   | 7661   | 7908   | 8209 | 8559   | 8639   | 8687   | 9017 | 9308   | 9378   |
| J6cc reference                        | G      | C    | C    | T      | G      | G      | T      | G      | A    | A      | G      | G      | G    | T      | T      |
| Nucleotide change                     | C      | ins  | del  | C      | A      | C      | C      | A      | del  | G      | A      | C      | ins  | C      | C      |
| Allele frequency (%) <sup>c</sup>     | 100    | nd   | nd   | nd     | 6      | nd     | 39     | nd     | nd   | nd     | nd     | 81     | nd   | nd     | 95     |
| # Subclones <sup>d</sup>              |        |      |      |        |        |        |        |        |      |        |        |        |      |        |        |
| 2                                     | x      |      | x    |        |        |        | x      | x      |      |        |        | x      |      |        | x      |
| 10                                    | x      |      |      |        |        |        | x      |        |      |        |        | x      | x    |        | x      |
| 11                                    | x      |      | x    |        |        |        | x      |        |      |        | x      | x      |      |        | x      |
| 13                                    | x      |      |      |        | x      |        |        |        |      |        |        | x      |      |        | x      |
| 14                                    | x      |      |      |        |        |        | x      |        |      |        |        | x      |      |        | x      |
| 18                                    | x      |      | x    |        | x      |        |        |        |      |        |        | x      |      |        | x      |
| 19                                    | x      |      |      |        |        |        | x      |        |      |        |        | x      |      |        | x      |
| 20                                    | x      | x    |      |        |        |        | x      |        |      | x      |        | del    |      |        | x      |
| 22                                    | x      |      |      |        |        | x      |        |        |      |        |        | x      |      | x      | x      |
| 26                                    | x      |      |      |        |        |        |        |        | x    |        |        | x      |      |        | x      |
| 27                                    | x      |      |      | x      |        |        |        |        |      |        |        | x      |      |        | x      |
| AA change J6cc reference <sup>e</sup> | A2367P | na   | na   | W2429R | E2434K | D2437H | C2441R | R2523K | na   | K2740R | E2767K | E2783Q | na   | S2990P | L3013S |
| Engineered construct <sup>f</sup>     | x      |      |      |        |        |        |        |        |      |        |        | x      |      |        | x      |

486

487 <sup>a</sup>, HCV protein, in which specified change was located.488 <sup>b</sup>, Nucleotide position, identity and change relating to the J6cc genome (Genbank accession number  
489 JQ745650).<sup>27</sup> Coding changes as well as insertions (ins) or deletions (del) occurring in at least one  
490 subclone are listed.491 <sup>c</sup>, Allele frequency of the identified nucleotide change in J6cc-PP-35 as determined by NGS  
492 (Supplementary Table 5). nd, not detected in NGS.493 <sup>d</sup>, Number of subclone. x, indicates presence of the respective change. Grey shadings indicate which  
494 subclone fragments were used for construction of the engineered construct.495 <sup>e</sup>, Amino acid change specified by amino acid position, identity and change relating to the J6cc  
496 polyprotein (Genbank accession number JQ745650). na, not applicable. \*, stop codon.497 <sup>f</sup>, x, indicates that the respective nucleotide change was engineered for generation of J6cc-HI.

498 Supplementary Table 9. Subclonal analysis of polyclonal passaged genotype 3a HCV.

| HCV protein <sup>a</sup>                 | core |      |      |       | E1    | E2    |       |       |       | p7    |
|------------------------------------------|------|------|------|-------|-------|-------|-------|-------|-------|-------|
| Nucleotide position <sup>b</sup>         | 386  | 529  | 618  | 755   | 1453  | 1501  | 1522  | 1544  | 2068  | 2731  |
| DBN3acc reference                        | T    | C    | G    | T     | G     | A     | G     | T     | G     | A     |
| Nucleotide change                        | C    | A    | A    | C     | T     | G     | A     | C     | A     | G     |
| Allele frequency (%) <sup>c</sup>        | nd   | nd   | nd   | nd    | nd    | 7     | 97    | nd    | 0.6   | nd    |
| # Subclones <sup>d</sup>                 |      |      |      |       |       |       |       |       |       |       |
| 1                                        |      |      |      |       |       |       | x     |       | x     |       |
| 2                                        |      |      |      | x     |       |       | x     |       |       |       |
| 3                                        |      |      | x    |       |       |       | x     |       |       |       |
| 4                                        | x    | x    |      |       | x     |       | x     | x     |       |       |
| 5                                        |      |      |      |       |       | x     | x     |       |       |       |
| 6                                        |      |      |      |       |       |       | x     |       |       |       |
| 7                                        |      |      |      | x     |       |       | x     |       |       |       |
| 8                                        |      |      |      |       |       |       | x     |       |       |       |
| 9                                        |      |      |      |       |       |       | x     |       |       |       |
| 10                                       |      |      |      |       |       |       | x     |       |       | x     |
| AA change DBN3acc reference <sup>e</sup> | I16T | P64T | W93* | L139P | A372S | I388V | G395R | L402S | E577K | T798A |
| Engineered construct <sup>f</sup>        |      |      |      |       |       |       |       |       |       |       |

| HCV protein <sup>a</sup>                 | NS2   |      |       |       | NS3    |        |      |        |        | NS4A   |        |        |
|------------------------------------------|-------|------|-------|-------|--------|--------|------|--------|--------|--------|--------|--------|
| Nucleotide position <sup>b</sup>         | 2905  | 2941 | 2962  | 3152  | 4093   | 4588   | 4771 | 5105   | 5158   | 5549   | 5589   | 5597   |
| DBN3acc reference                        | G     | G    | G     | G     | G      | A      | T    | A      | C      | A      | A      | T      |
| Nucleotide change                        | A     | del  | A     | A     | C      | G      | ins  | G      | T      | G      | T      | G      |
| Allele frequency (%) <sup>c</sup>        | 96    | nd   | 97    | 0.7   | nd     | 0.4    | nd   | 97     | nd     | 0.6    | 0.4    | 96     |
| # Subclones <sup>d</sup>                 |       |      |       |       |        |        |      |        |        |        |        |        |
| 1                                        | x     |      | x     |       |        |        |      | x      | x      |        |        | x      |
| 2                                        |       |      |       |       |        | x      | x    | x      |        |        |        | x      |
| 3                                        | x     |      | x     |       |        |        |      | x      |        | x      |        | x      |
| 4                                        | x     | x    | x     |       |        |        |      | x      |        |        |        | x      |
| 5                                        | x     |      | x     |       |        |        |      | x      |        |        | x      | x      |
| 6                                        | x     |      | x     | x     | x      |        |      | x      |        |        |        | x      |
| 7                                        |       |      |       |       |        | x      | x    | x      |        |        |        | x      |
| 8                                        | x     |      | x     |       |        |        |      | x      |        |        |        | x      |
| 9                                        | x     |      | x     |       |        |        |      | x      |        |        |        | x      |
| 10                                       | x     |      | x     |       |        |        |      | x      |        |        |        | x      |
| AA change DBN3acc reference <sup>e</sup> | A856T | na   | G875R | G938E | V1252L | M1417V | na   | N1589S | P1607S | E1737G | Q1750H | I1753S |
| Engineered construct <sup>f</sup>        | x     |      | x     |       |        |        |      |        |        | x      |        | x      |

499

| HCV protein <sup>a</sup>                 | NS4B   |        |        | NS5A |        |        |        |        | NS5B   |      |        |        |        |
|------------------------------------------|--------|--------|--------|------|--------|--------|--------|--------|--------|------|--------|--------|--------|
| Nucleotide position <sup>b</sup>         | 5726   | 5872   | 6427   | 6800 | 7048   | 7409   | 7465   | 7622   | 8552   | 8571 | 8612   | 8759   | 8824   |
| DBN3acc reference                        | C      | G      | G      | T    | A      | A      | A      | T      | G      | T    | A      | A      | G      |
| Nucleotide change                        | T      | C      | A      | T    | G      | T      | T      | C      | C      | del  | C      | G      | A      |
| Allele frequency (%) <sup>c</sup>        | nd     | nd     | nd     | ins  | nd     | nd     | nd     | 97     | nd     | nd   | nd     | 97     | 3      |
| # Subclones <sup>d</sup>                 |        |        |        |      |        |        |        |        |        |      |        |        |        |
| 1                                        |        |        |        |      |        |        |        | x      |        | x    | x      | x      |        |
| 2                                        |        |        |        | x    |        |        | x      | x      |        |      |        | x      |        |
| 3                                        |        |        |        |      |        |        |        | x      |        |      |        | x      |        |
| 4                                        |        | x      |        |      |        |        |        | x      |        |      |        | x      |        |
| 5                                        |        |        | x      |      |        |        |        | x      | x      |      |        | x      |        |
| 6                                        |        |        |        |      | x      |        |        | x      |        |      |        | x      | x      |
| 7                                        |        |        |        | x    |        |        | x      | x      |        |      |        | x      |        |
| 8                                        | x      |        |        |      |        |        |        | x      |        |      |        | x      |        |
| 9                                        |        |        |        |      |        | x      |        | x      |        |      |        | x      |        |
| 10                                       |        |        |        |      |        |        |        | x      |        |      |        | x      |        |
| AA change DBN3acc reference <sup>e</sup> | S1796F | A1845P | G2030S | na   | N2237D | K2357I | T2376S | V2428A | G2738A | na   | D2758A | D2807G | E2829K |
| Engineered construct <sup>f</sup>        |        |        |        |      |        |        |        | x      |        |      |        | x      |        |

500

501 <sup>a</sup>, HCV protein, in which specified change was located.502 <sup>b</sup>, Nucleotide position, identity and change relating to the DBN3acc genomes (Genbank accession  
503 number KX280714).<sup>28</sup> Coding changes as well as insertions (ins) or deletions (del) occurring in at  
504 least one subclone are listed.505 <sup>c</sup>, Allele frequency of the identified nucleotide change in DBNcc-PP-16 as determined by NGS  
506 (Supplementary Table 6). nd, not detected in NGS.507 <sup>d</sup>, Number of subclone. x, indicates presence of the respective change. Grey shadings indicate which  
508 subclone fragments were used for construction of the engineered construct.509 <sup>e</sup>, Amino acid change specified by amino acid position, identity and change relating to the DBN3acc  
510 polyprotein (Genbank accession number KX280714). na, not applicable. \*, stop codon511 <sup>f</sup>, x indicates that the respective nucleotide change was engineered for generation of DBNcc-HI.

512 Supplementary Table 10. Substitutions acquired during serial passage of HCV in this study and  
 513 previously reported cell culture infectious HCV recombinants.

| AA position<br>H77<br>reference <sup>a</sup> | Substitutions in this<br>study <sup>b</sup> |              |               | Substitutions in previous studies <sup>c</sup> |        |              |             |             |      | References <sup>d</sup>                                       |
|----------------------------------------------|---------------------------------------------|--------------|---------------|------------------------------------------------|--------|--------------|-------------|-------------|------|---------------------------------------------------------------|
|                                              | TNcc-<br>P38                                | J6cc-<br>P35 | DBNcc-<br>P16 | H77cc                                          | HCV1cc | H77-<br>JFH1 | J4-<br>JFH1 | J6-<br>JFH1 | JFH1 |                                                               |
| 32                                           | G-S                                         |              |               |                                                |        |              |             |             | G-S  | Aligeti et al., <i>J Virol.</i> 2015;22:11523-11533           |
| 78                                           |                                             | K-E          |               |                                                |        |              |             |             | K-E  | Bungyoku et al., <i>J Gen Virol.</i> 2009;7:1681-1691         |
| 787                                          | V-A                                         |              |               |                                                |        | V-A          |             |             |      | Scheel et al., <i>Proc Natl Acad Sci USA.</i> 2008;3:997-1002 |
| 1326                                         |                                             | I-V          |               |                                                |        | I-V          |             |             |      | Li et al., <i>J Virol.</i> 2015;1:811-823                     |
| 1496                                         |                                             | L-P          |               |                                                |        |              | Q-L         |             |      | Gottwein et al, <i>Hepatology.</i> 2009;49:364-377            |
| 1909                                         | G-A                                         |              |               | G-S                                            |        |              |             |             |      | Li et al., <i>J Virol.</i> 2015;1:811-823                     |
| 2417                                         | V-A                                         |              | V-A           | V-A                                            |        |              |             |             |      | Li et al., <i>J Virol.</i> 2015;1:811-823                     |

514

515 <sup>a</sup>, Amino acid position, relating to the H77 reference polyprotein (Genbank accession number  
 516 AF009606).

517 <sup>b</sup>, Amino acid substitutions identified in the TNcc-P38.1, J6cc-P35 and DBNcc-P16 polyproteins that  
 518 were subsequently engineered.

519 <sup>c</sup>, Amino acid substitutions reported in previously developed cell culture infectious HCV  
 520 recombinants.

521 <sup>d</sup>, literature references
